# Supplementary material for: Adduct annotation in liquid chromatography/high-resolution mass spectrometry to enhance compound identification
Source: PubMed Central journal article supplement (PMC7806579; doi:10.1007/s00216-020-03019-3), 2020-10-29
Supplement: 216_2020_3019_MOESM1_ESM.pdf [file 216_2020_3019_MOESM1_ESM.pdf]

## **Analytical and Bioanalytical Chemistry**

### **Electronic Supplementary Material**

#### **Adduct annotation in liquid chromatography/high-resolution mass spectrometry to enhance compound identification**

Thomas Stricker, Ron Bonner, Frédérique Lisaek, Gérard Hopfgartner

Additional files available under [10.1007/s00216-020-03019-3](https://doi.org/10.1007/s00216-020-03019-3).

# Adduct annotation in liquid chromatography/high-resolution mass spectrometry to enhance compound identification

Thomas Stricker<sup>1,3</sup>, Ron Bonner<sup>2</sup>, Frédérique Lisaček<sup>3</sup> and Gérard Hopfgartner<sup>1\*</sup>

1. Life Sciences Mass Spectrometry, Department of Inorganic and Analytical Chemistry, University of Geneva, 24 Quai Ernest Ansermet, CH-1211 Geneva 4, Switzerland
2. Ron Bonner Consulting, Newmarket, ON, L3Y 3C7, Canada
3. Proteome Informatics Group (PIG), Swiss Institute of Bioinformatics and University of Geneva, 7, route de Drize, CH-1211 Geneva 4, Switzerland

\* corresponding author

Supplementary Info

## Table of Contents

|                                                                                                                                                                                                                                                                                                                                                                                                                                                                                                                                                                                                                                                                                                                                               |    |
|-----------------------------------------------------------------------------------------------------------------------------------------------------------------------------------------------------------------------------------------------------------------------------------------------------------------------------------------------------------------------------------------------------------------------------------------------------------------------------------------------------------------------------------------------------------------------------------------------------------------------------------------------------------------------------------------------------------------------------------------------|----|
| Supplementary Figures .....                                                                                                                                                                                                                                                                                                                                                                                                                                                                                                                                                                                                                                                                                                                   | 4  |
| Figure S1: Manually annotated mass spectra of N-acetyl-phenylalanine, considering a set of 12 annotations. ....                                                                                                                                                                                                                                                                                                                                                                                                                                                                                                                                                                                                                               | 4  |
| Figure S2: Summary of the analysis of three replicates generated for both the standards mixture and urine sample with CliqueMS. The three replicates were acquired using XCMS with various signal-to-noise thresholds (sn1-sn24), and the prefilters option was either enabled and set to its default values or entirely disabled (nf). Certain features were not consistently grouped in the same clique, when a specific dataset was analysed several times with identical parameters. As the CliqueMS scoring system is strongly dependent on connectivity, differences in the content of the pseudo-spectra can affect the annotation of the metabolites. In the end, several analytes were annotated in only one or two replicates. .... | 5  |
| Figure S3: Summary of the analysis of CAMERA's features annotation and grouping performance for standards mixture (52 analytes) and the urine sample (35 target analytes). ....                                                                                                                                                                                                                                                                                                                                                                                                                                                                                                                                                               | 6  |
| Supplementary Tables:.....                                                                                                                                                                                                                                                                                                                                                                                                                                                                                                                                                                                                                                                                                                                    | 7  |
| Table S1: Summary of the 408 analytes producing [M+H] <sup>+</sup> ions by flow injection analysis (UNIGE-FIA/MS). Analytes in yellow are the 6 analytes where mzAdan failed to identify the [M+H] <sup>+</sup> .....                                                                                                                                                                                                                                                                                                                                                                                                                                                                                                                         | 7  |
| Table S2: Summary of the 52 metabolites of the LC-mixture (UNIGE-LC/MS). ....                                                                                                                                                                                                                                                                                                                                                                                                                                                                                                                                                                                                                                                                 | 17 |
| Table S3: Summary of the 35 metabolites considered in the human urine sample. ....                                                                                                                                                                                                                                                                                                                                                                                                                                                                                                                                                                                                                                                            | 19 |
| Table S4: Annotation set used for the manual annotation of the standards mixture mass spectra, including PeakView data and XCMS pseudo-spectra. Mass differences are relative to the Molecular Weight. ....                                                                                                                                                                                                                                                                                                                                                                                                                                                                                                                                   | 20 |
| Table S5: Default and optimised XCMS parameter settings obtained with IPO.....                                                                                                                                                                                                                                                                                                                                                                                                                                                                                                                                                                                                                                                                | 20 |
| Table S6: Detailed parameters used for XCMS and CAMERA for the comparative analysis of XCMS-based annotation tools.....                                                                                                                                                                                                                                                                                                                                                                                                                                                                                                                                                                                                                       | 21 |
| Table S7: Detailed parameters used for XCMS and CliqueMS for the comparative analysis of XCMS-based annotation tools.....                                                                                                                                                                                                                                                                                                                                                                                                                                                                                                                                                                                                                     | 21 |
| Table S8: Detailed parameters used for XCMS, CAMERA and findMAIN for the comparative analysis of XCMS-based annotation tools. ....                                                                                                                                                                                                                                                                                                                                                                                                                                                                                                                                                                                                            | 21 |
| Table S9: Detailed parameters used for XCMS, CAMERA and mzAdan for the comparative analysis of XCMS-based annotation tools. ....                                                                                                                                                                                                                                                                                                                                                                                                                                                                                                                                                                                                              | 23 |
| Table S10: Annotation set used with CAMERA for the comparative analysis of XCMS-based annotation tools. ...                                                                                                                                                                                                                                                                                                                                                                                                                                                                                                                                                                                                                                   | 23 |
| Table S11: Annotation set used with CliqueMS for the comparative analysis of XCMS-based annotation tools. ....                                                                                                                                                                                                                                                                                                                                                                                                                                                                                                                                                                                                                                | 24 |
| Table S12: Annotation set used with FindMAIN for the comparative analysis of XCMS-based annotation tools. ...                                                                                                                                                                                                                                                                                                                                                                                                                                                                                                                                                                                                                                 | 24 |
| Table S13: Annotation set used with mzAdan for the comparative analysis of XCMS-based annotation tools.....                                                                                                                                                                                                                                                                                                                                                                                                                                                                                                                                                                                                                                   | 24 |
| Table S14: Candidate lists proposed by mzAdan for the data in Figures 2 and 3 .....                                                                                                                                                                                                                                                                                                                                                                                                                                                                                                                                                                                                                                                           | 25 |
| Table S15: Peak annotation summary for L-proline by FIA-MS analysis (Figure 3) .....                                                                                                                                                                                                                                                                                                                                                                                                                                                                                                                                                                                                                                                          | 26 |
| Table S16: Relative intensities of the 13 adducts (including protonated forms) of the LC/MS analysis of the 52 analyte mix. Mass spectra were generated with PeakView (average at FWHM and background subtracted). Only annotations with correct retention times were considered (mzAdan and XIC). ....                                                                                                                                                                                                                                                                                                                                                                                                                                       | 27 |
| Table S17: Relative intensities of the 13 adducts (including protonated forms) following manual annotation of the standards mixture mass spectra with features detected using XCMS with the recommended parameters, and pseudo-mass spectra were generated with CAMERA.....                                                                                                                                                                                                                                                                                                                                                                                                                                                                   | 29 |
| Table S18: Number of features corresponding to known analytes or adducts detected in the standards mixture with XCMS.....                                                                                                                                                                                                                                                                                                                                                                                                                                                                                                                                                                                                                     | 31 |
| Table S19: Peak picking results for the standard mixture using XCMS with various signal-to-noise thresholds (sn1-sn24), and prefilters either enabled and set to their default values or entirely disabled (nf). ....                                                                                                                                                                                                                                                                                                                                                                                                                                                                                                                         | 32 |
| Table S20: Summary of the annotation of the standards mixture using XCMS-CAMERA with various signal-to-noise thresholds (sn1-sn24), and prefilters either enabled and set to their default values or entirely disabled (nf). ...                                                                                                                                                                                                                                                                                                                                                                                                                                                                                                              | 34 |

Table S21: Summary of the annotation of the standards mixture using XCMS-CliqueMS with various signal-to-noise thresholds (sn1-sn24), and prefilters either enabled and set to their default values or entirely disabled (nf). ...36

Table S22: Summary of the annotation of the standards mixture using XCMS-FindMain with various signal-to-noise thresholds (sn1-sn24), and prefilters either enabled and set to their default values or entirely disabled (nf). ...38

Table S23: Summary of the annotation of the standards mixture using XCMS-mzAdan with various signal-to-noise thresholds (sn1-sn24), and prefilters either enabled and set to their default values or entirely disabled (nf)..... 40

Table S24: Summary of the peak picking process of the urine sample using XCMS with various signal-to-noise thresholds (sn1-sn24), and prefilters either enabled and set to their default values or entirely disabled (nf)..... 42

Table S25: Summary of the annotation of the urine sample using XCMS-CAMERA with various signal-to-noise thresholds (sn1-sn24), and prefilters either enabled and set to their default values or entirely disabled (nf)..... 44

Table S26: Summary of the annotation of the urine sample using XCMS-CliqueMS with various signal-to-noise thresholds (sn1-sn24), and prefilters either enabled and set to their default values or entirely disabled (nf)..... 46

Table S27: Summary of the annotation of the urine sample using XCMS-FindMain with various signal-to-noise thresholds (sn1-sn24), and prefilters either enabled and set to their default values or entirely disabled (nf)..... 47

Table S28: Summary of the annotation of the urine sample using XCMS-mzAdan with various signal-to-noise thresholds (sn1-sn24), and prefilters either enabled and set to their default values or entirely disabled (nf)..... 48

## Supplementary Figures:

### N-acetyl-L-phenylalanine (Eluting at 10.36 min)

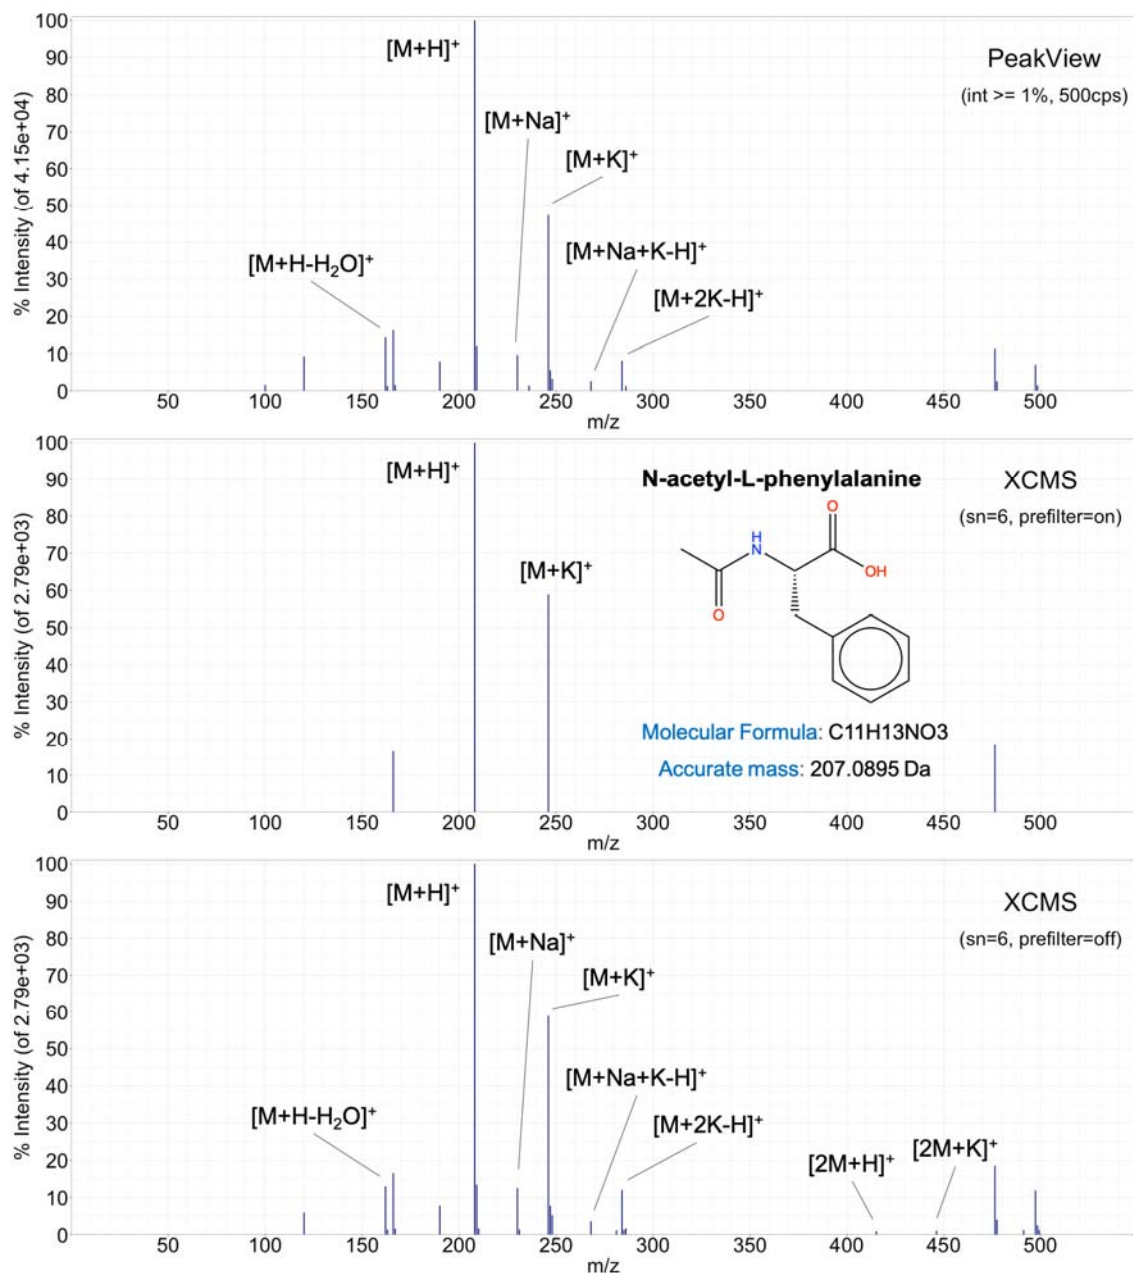

Figure S1: Manually annotated mass spectra of N-acetyl-phenylalanine, considering a set of 12 annotations. Mass spectra were generated using either PeakView (Sciex) or XCMS-CAMERA. Only monoisotopic peaks with intensities above 1% and 500 cps were considered for annotation in PeakView mass spectra, while XCMS pseudo-spectra were annotated as is. Disabling the prefilters option in XCMS allowed detection of a higher number of features, including many corresponding to adducts. A total of six and eight peaks were annotated with respectively PeakView, and XCMS with prefilters turned off. In contrast, only the protonated form and the potassium adduct of the N-acetyl-L-phenylalanine were detected using XCMS with prefilters enabled and set to their default values.

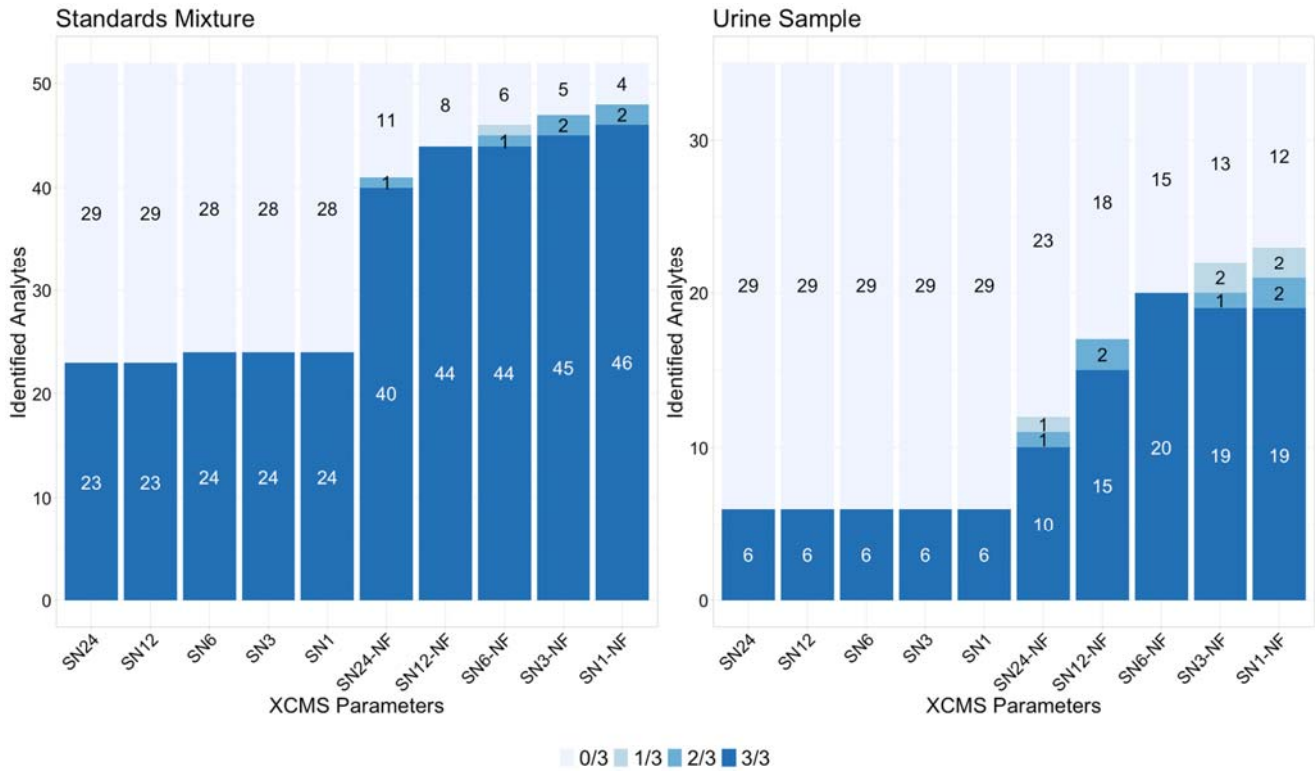

Figure S2: Summary of the analysis of three replicates generated for both the standards mixture and urine sample with CliqueMS. The three replicates were acquired using XCMS with various signal-to-noise thresholds (sn1-sn24), and the prefilters option was either enabled and set to its default values or entirely disabled (nf). Certain features were not consistently grouped in the same clique, when a specific dataset was analysed several times with identical parameters. As the CliqueMS scoring system is strongly dependent on connectivity, differences in the content of the pseudo-spectra can affect the annotation of the metabolites. In the end, several analytes were annotated in only one or two replicates.

### Standards Mixture

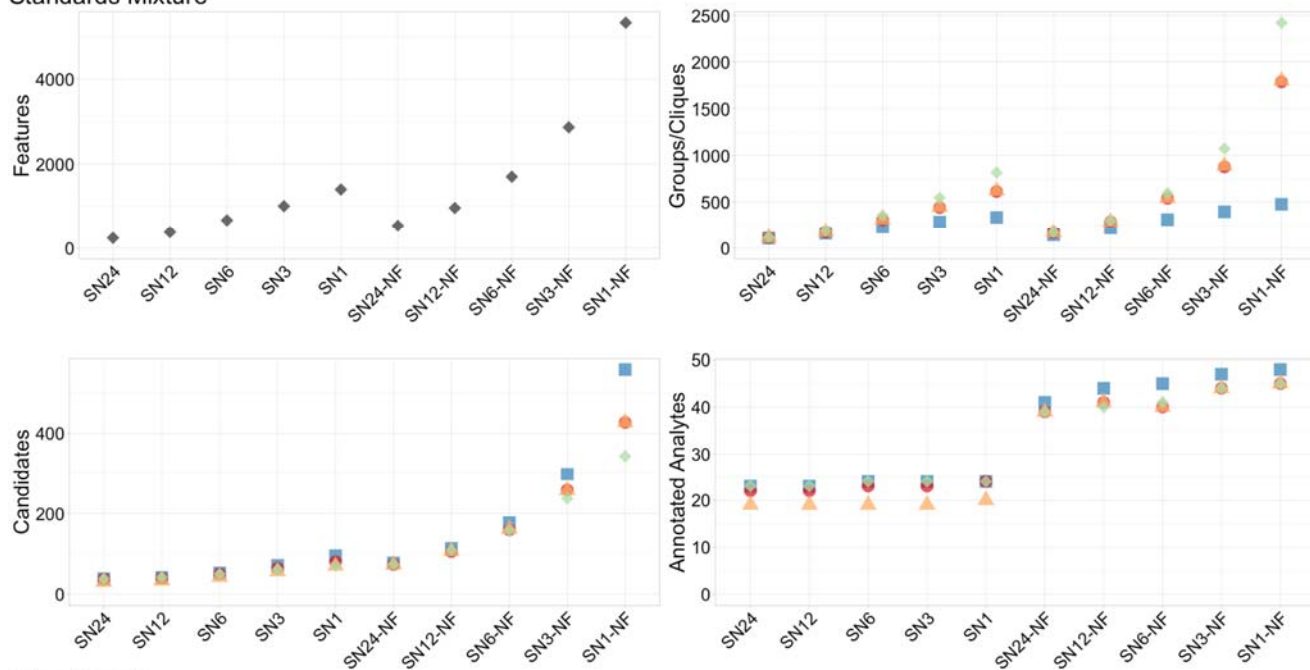

### Urine Sample

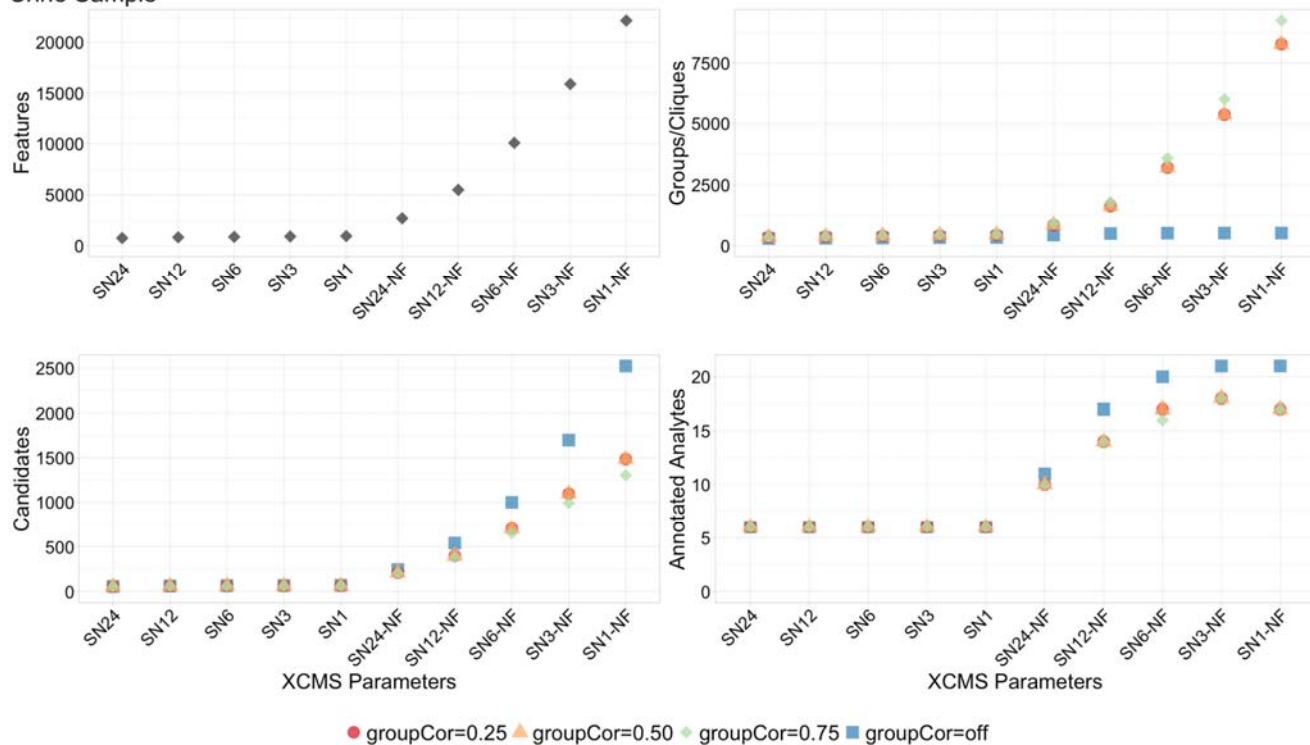

Figure S3: Summary of the analysis of CAMERA's features annotation and grouping performance for standards mixture (52 analytes) and the urine sample (35 target analytes). The tool was tested with different parameters, including different thresholds for the peak grouping function based on EICs shape similarity (*groupCor*). Lowering the threshold increased the tool's performances, as more analyte-derived features are grouped in the same spectrum, which consequently decreases the total number of pseudo-spectra, increases the number of annotated  $[M+H]^+$  candidates and thus the amount of correctly annotated analytes.

## Supplementary Tables:

Table S1: Summary of the 408 analytes producing  $[M+H]^+$  ions by flow injection analysis (UNIGE-FIA/MS). Analytes in yellow are the 6 analytes where mzAdan failed to identify the  $[M+H]^+$ .

| Name                      | Formula       | Exact mass |
|---------------------------|---------------|------------|
| 3-Hydroxybutyric acid     | C4H8O3        | 104.0473   |
| Allantoin                 | C4H6N4O3      | 158.044    |
| Diaminopimelic acid       | C7H14N2O4     | 190.0954   |
| Alpha-Linolenic acid      | C18H30O2      | 278.2246   |
| Lansoprazole              | C16H14F3N3O2S | 369.0759   |
| NADH                      | C21H29N7O14P2 | 665.1248   |
| Methylguanidine           | C2H7N3        | 73.064     |
| Glycine                   | C2H5NO2       | 75.032     |
| Trimethylamine N-oxide    | C3H9NO        | 75.0684    |
| 2-Pyrrolidinone           | C4H7NO        | 85.0528    |
| Gamma-Butyrolactone       | C4H6O2        | 86.0368    |
| Beta-Alanine              | C3H7NO2       | 89.0477    |
| Sarcosine                 | C3H7NO2       | 89.0477    |
| L-Alanine                 | C3H7NO2       | 89.0477    |
| D-Alanine                 | C3H7NO2       | 89.0477    |
| 2-Piperidinone            | C5H9NO        | 99.0684    |
| Senecioic acid            | C5H8O2        | 100.0524   |
| L-Alpha-aminobutyric acid | C4H9NO2       | 103.0633   |
| D-Alpha-aminobutyric acid | C4H9NO2       | 103.0633   |
| Gamma-Aminobutyric acid   | C4H9NO2       | 103.0633   |
| Dimethylglycine           | C4H9NO2       | 103.0633   |
| 3-Aminoisobutanoic acid   | C4H9NO2       | 103.0633   |
| 2,3-Diaminopropionic acid | C3H8N2O2      | 104.0586   |
| L-Serine                  | C3H7NO3       | 105.0426   |
| Diethanolamine            | C4H11NO2      | 105.079    |
| Hypotaurine               | C2H7NO2S      | 109.0197   |
| Cytosine                  | C4H5N3O       | 111.0433   |
| Histamine                 | C5H9N3        | 111.0796   |
| Uracil                    | C4H4N2O2      | 112.0273   |
| Creatinine                | C4H7N3O       | 113.0589   |
| Dihydrouracil             | C4H6N2O2      | 114.0429   |
| N-Methylhydantoin         | C4H6N2O2      | 114.0429   |
| Delta-Hexanolactone       | C6H10O2       | 114.0681   |
| Gamma-Caprolactone        | C6H10O2       | 114.0681   |
| L-Proline                 | C5H9NO2       | 115.0633   |
| Levulinic acid            | C5H8O3        | 116.0473   |
| Acetylglycine             | C4H7NO3       | 117.0426   |



|                                 |           |          |
|---------------------------------|-----------|----------|
| Betaine                         | C5H11NO2  | 117.079  |
| L-Valine                        | C5H11NO2  | 117.079  |
| 5-Aminopentanoic acid           | C5H11NO2  | 117.079  |
| N-Methyl-a-aminoisobutyric acid | C5H11NO2  | 117.079  |
| L-Homoserine                    | C4H9NO3   | 119.0582 |
| L-Threonine                     | C4H9NO3   | 119.0582 |
| Purine                          | C5H4N4    | 120.0436 |
| L-Cysteine                      | C3H7NO2S  | 121.0197 |
| Benzamide                       | C7H7NO    | 121.0528 |
| Niacinamide                     | C6H6N2O   | 122.048  |
| Nicotinic acid                  | C6H5NO2   | 123.032  |
| Picolinic acid                  | C6H5NO2   | 123.032  |
| 4-Methylcatechol                | C7H8O2    | 124.0524 |
| Taurine                         | C2H7NO3S  | 125.0147 |
| Thymine                         | C5H6N2O2  | 126.0429 |
| Imidazoleacetic acid            | C5H6N2O2  | 126.0429 |
| 2,4-Diamino-6-hydroxypyrimidine | C4H6N4O   | 126.0542 |
| Pyroglutamic acid               | C5H7NO3   | 129.0426 |
| Pyrrolidonecarboxylic acid      | C5H7NO3   | 129.0426 |
| Pipecolic acid                  | C6H11NO2  | 129.079  |
| 1,1-Dimethylbiguanide           | C4H11N5   | 129.1014 |
| N-Acetylputrescine              | C6H14N2O  | 130.1106 |
| 4-Hydroxyproline                | C5H9NO3   | 131.0582 |
| N-Acetyl-L-alanine              | C5H9NO3   | 131.0582 |
| 5-Aminolevulinic acid           | C5H9NO3   | 131.0582 |
| Creatine                        | C4H9N3O2  | 131.0695 |
| 3-Methylindole                  | C9H9N     | 131.0735 |
| L-Norleucine                    | C6H13NO2  | 131.0946 |
| L-Alloisoleucine                | C6H13NO2  | 131.0946 |
| L-Leucine                       | C6H13NO2  | 131.0946 |
| L-Isoleucine                    | C6H13NO2  | 131.0946 |
| Aminocaproic acid               | C6H13NO2  | 131.0946 |
| Beta-Leucine                    | C6H13NO2  | 131.0946 |
| Monoethyl malonic acid          | C5H8O4    | 132.0423 |
| Methylsuccinic acid             | C5H8O4    | 132.0423 |
| L-Asparagine                    | C4H8N2O3  | 132.0535 |
| Glycyl-glycine                  | C4H8N2O3  | 132.0535 |
| Ornithine                       | C5H12N2O2 | 132.0899 |
| Indoxyl                         | C8H7NO    | 133.0528 |
| Methylcysteine                  | C4H9NO2S  | 135.0354 |
| Adenine                         | C5H5N5    | 135.0545 |
| N-Methylnicotinamide            | C7H8N2O   | 136.0637 |
| p-Aminobenzoic acid             | C7H7NO2   | 137.0477 |
| m-Aminobenzoic acid             | C7H7NO2   | 137.0477 |

|                                     |           |          |
|-------------------------------------|-----------|----------|
| Trigonelline                        | C7H7NO2   | 137.0477 |
| 3-Pyridylacetic acid                | C7H7NO2   | 137.0477 |
| 2-Aminobenzoic acid                 | C7H7NO2   | 137.0477 |
| Tyramine                            | C8H11NO   | 137.0841 |
| 2-Hydroxyphenethylamine             | C8H11NO   | 137.0841 |
| Urocanic acid                       | C6H6N2O2  | 138.0429 |
| 6-Hydroxynicotinic acid             | C6H5NO3   | 139.0269 |
| Phosphonoacetate                    | C2H5O5P   | 139.9875 |
| 1,3-Dimethyluracil                  | C6H8N2O2  | 140.0586 |
| L-Histidinol                        | C6H11N3O  | 141.0902 |
| 3-Hexenedioic acid                  | C6H8O4    | 144.0423 |
| 4-Hydroxycyclohexyl-carboxylic acid | C7H12O3   | 144.0786 |
| 4-Guanidinobutanoic acid            | C5H11N3O2 | 145.0851 |
| Monomethyl glutaric acid            | C6H10O4   | 146.0579 |
| Methylglutaric acid                 | C6H10O4   | 146.0579 |
| 2,2-Dimethylsuccinic acid           | C6H10O4   | 146.0579 |
| L-Glutamine                         | C5H10N2O3 | 146.0691 |
| D-Glutamine                         | C5H10N2O3 | 146.0691 |
| L-Lysine                            | C6H14N2O2 | 146.1055 |
| D-Lysine                            | C6H14N2O2 | 146.1055 |
| L-Glutamic acid                     | C5H9NO4   | 147.0532 |
| Ribonolactone                       | C5H8O5    | 148.0372 |
| trans-Cinnamic acid                 | C9H8O2    | 148.0524 |
| Cinnamic acid                       | C9H8O2    | 148.0524 |
| L-Methionine                        | C5H11NO2S | 149.051  |
| 3-Methyladenine                     | C6H7N5    | 149.0701 |
| 6-Methyladenine                     | C6H7N5    | 149.0701 |
| 4-Ethylbenzoic acid                 | C9H10O2   | 150.0681 |
| (+)-(S)-Carvone                     | C10H14O   | 150.1045 |
| Acetaminophen                       | C8H9NO2   | 151.0633 |
| 2-Phenylglycine                     | C8H9NO2   | 151.0633 |
| Phenylpropanolamine                 | C9H13NO   | 151.0997 |
| 4-Hydroxy-3-methylbenzoic acid      | C8H8O3    | 152.0473 |
| 3-Cresotinic acid                   | C8H8O3    | 152.0473 |
| p-Anisic acid                       | C8H8O3    | 152.0473 |
| D-Arabitol                          | C5H12O5   | 152.0685 |
| L-Arabitol                          | C5H12O5   | 152.0685 |
| Ribitol                             | C5H12O5   | 152.0685 |
| D-Xylitol                           | C5H12O5   | 152.0685 |
| 3-Aminosalicylic acid               | C7H7NO3   | 153.0426 |
| FAPy-adenine                        | C5H7N5O   | 153.0651 |
| Dopamine                            | C8H11NO2  | 153.079  |
| 2,6-Dihydroxybenzoic acid           | C7H6O4    | 154.0266 |

|                                   |           |          |
|-----------------------------------|-----------|----------|
| 2,4-Dihydroxybenzoic acid         | C7H6O4    | 154.0266 |
| L-Histidine                       | C6H9N3O2  | 155.0695 |
| 2-Chlorobenzoic acid              | C7H5ClO2  | 155.9978 |
| L-Dihydroorotic acid              | C5H6N2O4  | 158.0328 |
| Succinylacetone                   | C7H10O4   | 158.0579 |
| Isovalerylglycine                 | C7H13NO3  | 159.0895 |
| DL-2-Aminooctanoic acid           | C8H17NO2  | 159.1259 |
| 3-Methyladipic acid               | C7H12O4   | 160.0736 |
| Pimelic acid                      | C7H12O4   | 160.0736 |
| Tryptamine                        | C10H12N2  | 160.1    |
| Indole-3-carboxylic acid          | C9H7NO2   | 161.0477 |
| Aminoadipic acid                  | C6H11NO4  | 161.0688 |
| Tryptophanol                      | C10H11NO  | 161.0841 |
| L-Carnitine                       | C7H15NO3  | 161.1052 |
| 5-Hydroxylysine                   | C6H14N2O3 | 162.1004 |
| Acetylcysteine                    | C5H9NO3S  | 163.0303 |
| 6-Dimethylaminopurine             | C7H9N5    | 163.0858 |
| 2-Phenylbutyric acid              | C10H12O2  | 164.0837 |
| Isoeugenol                        | C10H12O2  | 164.0837 |
| Methionine sulfoxide              | C5H11NO3S | 165.046  |
| 1-Methylguanine                   | C6H7N5O   | 165.0651 |
| 7-Methylguanine                   | C6H7N5O   | 165.0651 |
| L-Phenylalanine                   | C9H11NO2  | 165.079  |
| Benzocaine                        | C9H11NO2  | 165.079  |
| Phthalic acid                     | C8H6O4    | 166.0266 |
| 7-Methylxanthine                  | C6H6N4O2  | 166.0491 |
| 3-Phenoxypropionic acid           | C9H10O3   | 166.063  |
| Perillic acid                     | C10H14O2  | 166.0994 |
| Quinolinic acid                   | C7H5NO4   | 167.0219 |
| 3-Methoxytyramine                 | C9H13NO2  | 167.0946 |
| Phenylephrine                     | C9H13NO2  | 167.0946 |
| Phosphoenolpyruvic acid           | C3H5O6P   | 167.9824 |
| Homogentisic acid                 | C8H8O4    | 168.0423 |
| 5-Methoxysalicylic acid           | C8H8O4    | 168.0423 |
| Vanillic acid                     | C8H8O4    | 168.0423 |
| Pyridoxamine                      | C8H12N2O2 | 168.0899 |
| 2-Amino-3-phosphonopropionic acid | C3H8NO5P  | 169.014  |
| 2-Furoylglycine                   | C7H7NO4   | 169.0375 |
| 6-Hydroxydopamine                 | C8H11NO3  | 169.0739 |
| Pyridoxine                        | C8H11NO3  | 169.0739 |
| 3-Methylhistidine                 | C7H11N3O2 | 169.0851 |
| 1-Methylhistidine                 | C7H11N3O2 | 169.0851 |
| Diethylthiophosphate              | C4H11O3PS | 170.0167 |
| Glycerol 3-phosphate              | C3H9O6P   | 172.0137 |

|                                |           |          |
|--------------------------------|-----------|----------|
| Menadione                      | C11H8O2   | 172.0524 |
| Glycylproline                  | C7H12N2O3 | 172.0848 |
| Quinaldic acid                 | C10H7NO2  | 173.0477 |
| Suberic acid                   | C8H14O4   | 174.0892 |
| L-Arginine                     | C6H14N4O2 | 174.1117 |
| D-Arginine                     | C6H14N4O2 | 174.1117 |
| Guanidosuccinic acid           | C5H9N3O4  | 175.0593 |
| Indoleacetic acid              | C10H9NO2  | 175.0633 |
| Citrulline                     | C6H13N3O3 | 175.0957 |
| Ascorbic acid                  | C6H8O6    | 176.0321 |
| Ureidosuccinic acid            | C5H8N2O5  | 176.0433 |
| Allantoic acid                 | C4H8N4O4  | 176.0546 |
| 2-Isopropylmalic acid          | C7H12O5   | 176.0685 |
| Serotonin                      | C10H12N2O | 176.095  |
| Cotinine                       | C10H12N2O | 176.095  |
| N-Formyl-L-methionine          | C6H11NO3S | 177.046  |
| Gluconolactone                 | C6H10O6   | 178.0477 |
| 4-Methoxycinnamic acid         | C10H10O3  | 178.063  |
| Isoxanthopterin                | C6H5N5O2  | 179.0443 |
| Hippuric acid                  | C9H9NO3   | 179.0582 |
| Aspirin                        | C9H8O4    | 180.0423 |
| Caffeic acid                   | C9H8O4    | 180.0423 |
| Nicotinuric acid               | C8H8N2O3  | 180.0535 |
| D-Mannose                      | C6H12O6   | 180.0634 |
| Scyllitol                      | C6H12O6   | 180.0634 |
| Theobromine                    | C7H8N4O2  | 180.0647 |
| 3-Methoxybenzenepropanoic acid | C10H12O3  | 180.0786 |
| L-Tyrosine                     | C9H11NO3  | 181.0739 |
| o-Tyrosine                     | C9H11NO3  | 181.0739 |
| 9-Methyluric acid              | C6H6N4O3  | 182.044  |
| Homovanillic acid              | C9H10O4   | 182.0579 |
| Mannitol                       | C6H14O6   | 182.079  |
| Galactitol                     | C6H14O6   | 182.079  |
| Sorbitol                       | C6H14O6   | 182.079  |
| L-Homocysteic acid             | C4H9NO5S  | 183.0201 |
| Normetanephrine                | C9H13NO3  | 183.0895 |
| Phosphoserine                  | C3H8NO6P  | 185.0089 |
| 3-Phosphoglyceric acid         | C3H7O7P   | 185.9929 |
| Indoleacrylic acid             | C11H9NO2  | 187.0633 |
| Azelaic acid                   | C9H16O4   | 188.1049 |
| N-Alpha-acetyllysine           | C8H16N2O3 | 188.1161 |
| Glycyl-L-leucine               | C8H16N2O3 | 188.1161 |
| Homo-L-arginine                | C7H16N4O2 | 188.1273 |
| N-Acetylglutamic acid          | C7H11NO5  | 189.0637 |

|                             |            |          |
|-----------------------------|------------|----------|
| 3-Indolepropionic acid      | C11H11NO2  | 189.079  |
| Homocitrulline              | C7H15N3O3  | 189.1113 |
| 5-Methoxytryptamine         | C11H14N2O  | 190.1106 |
| 5-Hydroxyindoleacetic acid  | C10H9NO3   | 191.0582 |
| N-Acetyl-L-methionine       | C7H13NO3S  | 191.0616 |
| 5-Methoxytryptophol         | C11H13NO2  | 191.0946 |
| Citric acid                 | C6H8O7     | 192.027  |
| Isocitric acid              | C6H8O7     | 192.027  |
| D-threo-Isocitric acid      | C6H8O7     | 192.027  |
| Quinic acid                 | C7H12O6    | 192.0634 |
| Phenylacetyl glycine        | C10H11NO3  | 193.0739 |
| Isoferulic acid             | C10H10O4   | 194.0579 |
| trans-Ferulic acid          | C10H10O4   | 194.0579 |
| 4-Aminohippuric acid        | C9H10N2O3  | 194.0691 |
| Alpha-Hydroxyhippuric acid  | C9H9NO4    | 195.0532 |
| Gluconic acid               | C6H12O7    | 196.0583 |
| Galactonic acid             | C6H12O7    | 196.0583 |
| 1,3-Dimethyluric acid       | C7H8N4O3   | 196.0596 |
| 1,9-Dimethyluric acid       | C7H8N4O3   | 196.0596 |
| Guaifenesin                 | C10H14O4   | 198.0892 |
| Sebacic acid                | C10H18O4   | 202.1205 |
| L-Acetylcarnitine           | C9H17NO4   | 203.1158 |
| L-Tryptophan                | C11H12N2O2 | 204.0899 |
| Lipoamide                   | C8H15NOS2  | 205.0595 |
| Indolelactic acid           | C11H11NO3  | 205.0739 |
| (R)-lipoic acid             | C8H14O2S2  | 206.0435 |
| Ibuprofen                   | C13H18O2   | 206.1307 |
| N-Acetyl-L-phenylalanine    | C11H13NO3  | 207.0895 |
| Chalcone                    | C15H12O    | 208.0888 |
| 1,3,7-Trimethyluric acid    | C8H10N4O3  | 210.0753 |
| Phosphocreatine             | C4H10N3O5P | 211.0358 |
| 3-Methoxytyrosine           | C10H13NO4  | 211.0845 |
| 3-Chlorotyrosine            | C9H10ClNO3 | 215.0349 |
| Undecanedioic acid          | C11H20O4   | 216.1362 |
| 3-Hydroxydodecanoic acid    | C12H24O3   | 216.1725 |
| 12-Hydroxydodecanoic acid   | C12H24O3   | 216.1725 |
| 5-Methoxydimethyltryptamine | C13H18N2O  | 218.1419 |
| Pantothenic acid            | C9H17NO5   | 219.1107 |
| N-Acetylgalactosamine       | C8H15NO6   | 221.0899 |
| Beta-N-Acetylglucosamine    | C8H15NO6   | 221.0899 |
| N-Acetyl-D-glucosamine      | C8H15NO6   | 221.0899 |
| N-Acetylmannosamine         | C8H15NO6   | 221.0899 |
| L-Cystathionine             | C7H14N2O4S | 222.0674 |
| Hydroxykynurenine           | C10H12N2O4 | 224.0797 |

|                                |             |          |
|--------------------------------|-------------|----------|
| 3-Nitrotyrosine                | C9H10N2O5   | 226.059  |
| Carnosine                      | C9H14N4O3   | 226.1066 |
| Deoxycytidine                  | C9H13N3O4   | 227.0906 |
| Deoxyuridine                   | C9H12N2O5   | 228.0746 |
| Traumatic acid                 | C12H20O4    | 228.1362 |
| D-Ribose 5-phosphate           | C5H11O8P    | 230.0192 |
| Naproxen                       | C14H14O3    | 230.0943 |
| Dodecanedioic acid             | C12H22O4    | 230.1518 |
| Melatonin                      | C13H16N2O2  | 232.1212 |
| 5-Methoxytryptophan            | C12H14N2O3  | 234.1004 |
| 3,4,5-Trimethoxycinnamic acid  | C12H14O5    | 238.0841 |
| Thymidine                      | C10H14N2O5  | 242.0903 |
| Uridine                        | C9H12N2O6   | 244.0695 |
| Biotin                         | C10H16N2O3S | 244.0882 |
| 1,11-Undecanedicarboxylic acid | C13H24O4    | 244.1675 |
| Pyridoxal 5'-phosphate         | C8H10NO6P   | 247.0246 |
| Deoxyinosine                   | C10H12N4O4  | 252.0859 |
| Triamterene                    | C12H11N7    | 253.1076 |
| Daidzein                       | C15H10O4    | 254.0579 |
| Diphenhydramine                | C17H21NO    | 255.1623 |
| Glycerophosphocholine          | C8H20NO6P   | 257.1028 |
| Ribothymidine                  | C10H14N2O6  | 258.0852 |
| Tetradecanedioic acid          | C14H26O4    | 258.1831 |
| Glucosamine 6-phosphate        | C6H14NO8P   | 259.0457 |
| Propranolol                    | C16H21NO2   | 259.1572 |
| Mannose 6-phosphate            | C6H13O9P    | 260.0297 |
| Glucose 6-phosphate            | C6H13O9P    | 260.0297 |
| Fructose 6-phosphate           | C6H13O9P    | 260.0297 |
| Glucose 1-phosphate            | C6H13O9P    | 260.0297 |
| Alpha-Aspartyl-lysine          | C10H19N3O5  | 261.1325 |
| Atenolol                       | C14H22N2O3  | 266.163  |
| Adenosine                      | C10H13N5O4  | 267.0968 |
| Deoxyguanosine                 | C10H13N5O4  | 267.0968 |
| Metoprolol                     | C15H25NO3   | 267.1834 |
| Inosine                        | C10H12N4O5  | 268.0808 |
| Genistein                      | C15H10O5    | 270.0528 |
| Estrone                        | C18H22O2    | 270.162  |
| Doxylamine                     | C17H22N2O   | 270.1732 |
| Dextromethorphan               | C18H25NO    | 271.1936 |
| Estradiol                      | C18H24O2    | 272.1776 |
| Phloretin                      | C15H14O5    | 274.0841 |
| Ethenodeoxyadenosine           | C12H13N5O3  | 275.1018 |
| 6-Phosphogluconic acid         | C6H13O10P   | 276.0246 |
| L-Aspartyl-L-phenylalanine     | C13H16N2O5  | 280.1059 |

|                                  |               |          |
|----------------------------------|---------------|----------|
| Imipramine                       | C19H24N2      | 280.1939 |
| 1-Methyladenosine                | C11H15N5O4    | 281.1124 |
| Guanosine                        | C10H13N5O5    | 283.0917 |
| Xanthosine                       | C10H12N4O6    | 284.0757 |
| Retinal                          | C20H28O       | 284.214  |
| Kaempferol                       | C15H10O6      | 286.0477 |
| Luteolin                         | C15H10O6      | 286.0477 |
| Salicin                          | C13H18O7      | 286.1053 |
| Androstenedione                  | C19H26O2      | 286.1933 |
| Hexadecanedioic acid             | C16H30O4      | 286.2144 |
| 16b-Hydroxyestradiol             | C18H24O3      | 288.1725 |
| Estriol                          | C18H24O3      | 288.1725 |
| Androstenedione                  | C19H28O2      | 288.2089 |
| Testosterone                     | C19H28O2      | 288.2089 |
| Dehydroepiandrosterone           | C19H28O2      | 288.2089 |
| Epicatechin                      | C15H14O6      | 290.079  |
| Argininosuccinic acid            | C10H18N4O6    | 290.1226 |
| Androsterone                     | C19H30O2      | 290.2246 |
| Aspartame                        | C14H18N2O5    | 294.1216 |
| 17a-Ethynylestradiol             | C20H24O2      | 296.1776 |
| Hydrochlorothiazide              | C7H8ClN3O4S2  | 296.9645 |
| 5'-Methylthioadenosine           | C11H15N5O3S   | 297.0896 |
| 13-cis-Retinoic acid             | C20H28O2      | 300.2089 |
| All-trans-retinoic acid          | C20H28O2      | 300.2089 |
| Sphinganine                      | C18H39NO2     | 301.2981 |
| Ellagic acid                     | C14H6O8       | 302.0063 |
| Quercetin                        | C15H10O7      | 302.0427 |
| 2-Methoxyestradiol               | C19H26O3      | 302.1882 |
| Scopolamine                      | C17H21NO4     | 303.1471 |
| Iodotyrosine                     | C9H10INO3     | 306.9705 |
| dCMP                             | C9H14N3O7P    | 307.0569 |
| Glutathione                      | C10H17N3O6S   | 307.0838 |
| N-Acetylneuraminic acid          | C11H19NO9     | 309.106  |
| 16-Dehydroprogesterone           | C21H28O2      | 312.2089 |
| Ranitidine                       | C13H22N4O3S   | 314.1413 |
| Octadecanedioic acid             | C18H34O4      | 314.2457 |
| 5-Thymidylic acid                | C10H15N2O8P   | 322.0566 |
| Cytidine monophosphate           | C9H14N3O8P    | 323.0519 |
| Uridine 5'-monophosphate         | C9H13N2O9P    | 324.0359 |
| Cyclic AMP                       | C10H12N5O6P   | 329.0525 |
| Adenosine 2',3'-cyclic phosphate | C10H12N5O6P   | 329.0525 |
| Furosemide                       | C12H11ClN2O5S | 330.0077 |
| 11a-Hydroxyprogesterone          | C21H30O3      | 330.2195 |
| Deoxycorticosterone              | C21H30O3      | 330.2195 |

|                                    |               |          |
|------------------------------------|---------------|----------|
| 17-Hydroxyprogesterone             | C21H30O3      | 330.2195 |
| Deoxyadenosine monophosphate       | C10H14N5O6P   | 331.0682 |
| Famotidine                         | C8H15N7O2S3   | 337.0449 |
| Danazol                            | C22H27NO2     | 337.2042 |
| Canrenone                          | C22H28O3      | 340.2038 |
| Cellobiose                         | C12H22O11     | 342.1162 |
| Alpha-Lactose                      | C12H22O11     | 342.1162 |
| Sucrose                            | C12H22O11     | 342.1162 |
| Melibiose                          | C12H22O11     | 342.1162 |
| Lactulose                          | C12H22O11     | 342.1162 |
| Isomaltose                         | C12H22O11     | 342.1162 |
| Clotrimazole                       | C22H17ClN2    | 344.108  |
| Maltitol                           | C12H24O11     | 344.1319 |
| Medroxyprogesterone                | C22H32O3      | 344.2351 |
| Omeprazole                         | C17H19N3O3S   | 345.1147 |
| Corticosterone                     | C21H30O4      | 346.2144 |
| Cortexolone                        | C21H30O4      | 346.2144 |
| 2'-Deoxyguanosine 5'-monophosphate | C10H14N5O7P   | 347.0631 |
| Adenosine monophosphate            | C10H14N5O7P   | 347.0631 |
| Inosinic acid                      | C10H13N4O8P   | 348.0471 |
| Chlorogenic acid                   | C16H18O9      | 354.0951 |
| 2-Phenylaminoadenosine             | C16H18N6O4    | 358.139  |
| Cortisone                          | C21H28O5      | 360.1937 |
| Levofloxacin                       | C18H20FN3O4   | 361.1438 |
| Cortisol                           | C21H30O5      | 362.2093 |
| Guanosine monophosphate            | C10H14N5O8P   | 363.058  |
| Biocytin                           | C16H28N4O4S   | 372.1831 |
| Riboflavin                         | C17H20N4O6    | 376.1383 |
| Loratadine                         | C22H23ClN2O2  | 382.1448 |
| Vitamin D3                         | C27H44O       | 384.3392 |
| Cholestenone                       | C27H44O       | 384.3392 |
| 5alpha-Cholestanone                | C27H46O       | 386.3549 |
| Nutriacholic acid                  | C24H38O4      | 390.277  |
| 7a-Hydroxy-3-oxo-5b-cholanoic acid | C24H38O4      | 390.277  |
| Hyodeoxycholic acid                | C24H40O4      | 392.2927 |
| Chenodeoxycholic acid              | C24H40O4      | 392.2927 |
| Deoxycholic acid                   | C24H40O4      | 392.2927 |
| Pregnenolone sulfate               | C21H32O5S     | 396.197  |
| 7-Ketocholesterol                  | C27H44O2      | 400.3341 |
| Uridine 5'-diphosphate             | C9H14N2O12P2  | 404.0022 |
| ADP                                | C10H15N5O10P2 | 427.0294 |
| 3,5-Diiodo-L-tyrosine              | C9H9I2NO3     | 432.8672 |
| Uvaol                              | C30H50O2      | 442.3811 |



|                             |               |          |
|-----------------------------|---------------|----------|
| Guanosine diphosphate       | C10H15N5O11P2 | 443.0243 |
| Verapamil                   | C27H38N2O4    | 454.2832 |
| Flavin Mononucleotide       | C17H21N4O9P   | 456.1046 |
| Glycocholic acid            | C26H43NO6     | 465.309  |
| Glycyrrhetic acid           | C30H46O4      | 470.3396 |
| Taurodeoxycholic acid       | C26H45NO6S    | 499.2968 |
| Maltotriose                 | C18H32O16     | 504.169  |
| Raffinose                   | C18H32O16     | 504.169  |
| dGTP                        | C10H16N5O13P3 | 506.9957 |
| Adenosine triphosphate      | C10H16N5O13P3 | 506.9957 |
| Inosine triphosphate        | C10H15N4O14P3 | 507.9798 |
| Taurocholic acid            | C26H45NO7S    | 515.2917 |
| Guanosine triphosphate      | C10H16N5O14P3 | 522.9907 |
| Uridine diphosphate glucose | C15H24N2O17P2 | 566.055  |
| Mesoporphyrin IX            | C34H38N4O4    | 566.2893 |
| Bilirubin                   | C33H36N4O6    | 584.2635 |
| Hematoporphyrin IX          | C34H38N4O6    | 598.2791 |
| Hesperidin                  | C28H34O15     | 610.1898 |
| Liothyronine                | C15H12I3NO4   | 650.79   |
| Coproporphyrin I            | C36H38N4O8    | 654.269  |
| PC(16:0/16:0)               | C40H80NO8P    | 733.5622 |

Table S2: Summary of the 52 metabolites of the LC-mixture (UNIGE-LC/MS).

| ID  | Name                       | Formula     | Mass (Da) | Conc. (µg/ml) | RT (min) |
|-----|----------------------------|-------------|-----------|---------------|----------|
| M1  | L-Lysine                   | C6H14N2O2   | 146.106   | 100           | 1.12     |
| M2  | L-Histidine                | C6H9N3O2    | 155.07    | 100           | 1.15     |
| M3  | Carnosine                  | C9H14N4O3   | 226.107   | 25            | 1.16     |
| M4  | 1-Methylhistidine          | C7H11N3O2   | 169.085   | 10            | 1.17     |
| M5  | Diethanolamine             | C4H11NO2    | 105.079   | 25            | 1.2      |
| M6  | Glycerophosphocholine      | C8H20NO6P   | 257.103   | 20            | 1.2      |
| M7  | L-Glutamine                | C5H10N2O3   | 146.069   | 100           | 1.21     |
| M8  | Homo-L-arginine            | C7H16N4O2   | 188.127   | 20            | 1.22     |
| M9  | Betaine                    | C5H11NO2    | 117.079   | 20            | 1.25     |
| M10 | N-Methylnicotinamide       | C7H8N2O     | 136.064   | 10            | 1.26     |
| M11 | L-Carnitine                | C7H15NO3    | 161.105   | 5             | 1.27     |
| M12 | N-Acetylneuraminic_acid    | C11H19NO9   | 309.106   | 100           | 1.27     |
| M13 | Trigonelline               | C7H7NO2     | 137.048   | 10            | 1.3      |
| M14 | Creatinine                 | C4H7N3O     | 113.059   | 20            | 1.31     |
| M15 | Creatine                   | C4H9N3O2    | 131.07    | 25            | 1.34     |
| M16 | L-Proline                  | C5H9NO2     | 115.063   | 100           | 1.35     |
| M17 | Homocitrulline             | C7H15N3O3   | 189.111   | 25            | 1.38     |
| M18 | N-Acetylputrescine         | C6H14N2O    | 130.1110  | 20            | 1.56     |
| M19 | L-Acetylcarnitine          | C9H17NO4    | 203.116   | 5             | 1.82     |
| M20 | 4-Guanidinobutanoic_acid   | C5H11N3O2   | 145.085   | 20            | 1.88     |
| M21 | 3-Methyladenine            | C6H7N5      | 149.07    | 5             | 1.98     |
| M22 | Urocanic_acid              | C6H6N2O2    | 138.043   | 100           | 2.08     |
| M23 | 1-Methyladenosine          | C11H15N5O4  | 281.112   | 20            | 2.37     |
| M24 | 7-Methylguanine            | C6H7N5O     | 165.065   | 20            | 2.94     |
| M25 | Tyramine                   | C8H11NO     | 137.084   | 100           | 3.33     |
| M26 | Cotinine                   | C10H12N2O   | 176.095   | 5             | 3.86     |
| M27 | Guanosine                  | C10H13N5O5  | 283.092   | 100           | 4        |
| M28 | Cyclic_AMP                 | C10H12N5O6P | 329.053   | 100           | 4.25     |
| M29 | Ethenodeoxyadenosine       | C12H13N5O3  | 275.1020  | 20            | 4.58     |
| M30 | 3-Chlorotyrosine           | C9H10ClNO3  | 215.035   | 5             | 4.83     |
| M31 | 1,9-Dimethyluric_acid      | C7H8N4O3    | 196.06    | 100           | 5.34     |
| M32 | Pantothenic_acid           | C9H17NO5    | 219.111   | 20            | 5.7      |
| M33 | Acetaminophen              | C8H9NO2     | 151.063   | 20            | 5.75     |
| M34 | 1,3-Dimethyluric_acid      | C7H8N4O3    | 196.06    | 100           | 5.79     |
| M35 | Theobromine                | C7H8N4O2    | 180.065   | 20            | 5.93     |
| M36 | Isovalerylglycine          | C7H13NO3    | 159.09    | 25            | 7.01     |
| M37 | L-Aspartyl-L-phenylalanine | C13H16N2O5  | 280.1060  | 25            | 7.06     |
| M38 | Monomethyl_glutaric_acid   | C6H10O4     | 146.0580  | 100           | 7.57     |
| M39 | 1,3,7-Trimethyluric_acid   | C8H10N4O3   | 210.075   | 20            | 7.59     |

|     |                          |             |         |     |       |
|-----|--------------------------|-------------|---------|-----|-------|
| M40 | Chlorogenic_acid         | C16H18O9    | 354.095 | 100 | 7.62  |
| M41 | Hippuric_acid            | C9H9NO3     | 179.058 | 25  | 7.67  |
| M42 | 5'-Methylthioadenosine   | C11H15N5O3S | 297.09  | 20  | 7.68  |
| M43 | Quinaldic_acid           | C10H7NO2    | 173.048 | 20  | 7.93  |
| M44 | Phenylacetyl-glycine     | C10H11NO3   | 193.074 | 20  | 8.53  |
| M45 | Riboflavin               | C17H20N4O6  | 376.138 | 20  | 9.55  |
| M46 | N-Acetyl-L-phenylalanine | C11H13NO3   | 207.09  | 20  | 10.36 |
| M47 | Indoleacetic_acid        | C10H9NO2    | 175.063 | 25  | 11.38 |
| M48 | Azelaic_acid             | C9H16O4     | 188.105 | 25  | 12.86 |
| M49 | Phloretin                | C15H14O5    | 274.084 | 100 | 14.23 |
| M50 | Cortisone                | C21H28O5    | 360.194 | 10  | 14.43 |
| M51 | Taurocholic_acid         | C26H45NO7S  | 515.292 | 100 | 17.36 |
| M52 | Glycocholic_acid         | C26H43NO6   | 465.309 | 25  | 18.34 |

Table S3: Summary of the 35 metabolites considered in the human urine sample.

| ID  | Name                       | Formula     | Mass (Da) | Int (cps) | RT (min) |
|-----|----------------------------|-------------|-----------|-----------|----------|
| U1  | L-Histidine                | C6H9N3O2    | 155.069   | 9.85E+04  | 1.2      |
| U2  | 3-Methylhistidine          | C7H11N3O2   | 169.085   | 5.32E+05  | 1.21     |
| U3  | Betaine                    | C5H11NO2    | 117.079   | 1.04E+05  | 1.27     |
| U4  | Alpha-aminobutyric acid    | C4H9NO2     | 103.063   | 3.65E+03  | 1.27     |
| U5  | N-Methylnicotinamide       | C7H8N2O     | 136.064   | 1.11E+05  | 1.28     |
| U6  | L-Carnitine                | C7H15NO3    | 161.105   | 5.37E+05  | 1.29     |
| U7  | Trigonelline               | C7H7NO2     | 137.048   | 2.81E+05  | 1.31     |
| U8  | Creatinine                 | C4H7N3O     | 113.059   | 1.07E+06  | 1.35     |
| U9  | Glycylproline              | C7H12N2O3   | 172.085   | 1.91E+04  | 1.68     |
| U10 | L-Acetylcarnitine          | C9H17NO4    | 203.116   | 1.16E+06  | 1.82     |
| U11 | Urocanic acid              | C6H6N2O2    | 138.043   | 6.87E+04  | 2        |
| U12 | Pyroglutamic acid          | C5H7NO3     | 129.043   | 1.36E+05  | 2.11     |
| U13 | 3-Methyladenine            | C6H7N5      | 149.07    | 9.67E+04  | 2.2      |
| U14 | L-Tyrosine                 | C9H11NO3    | 181.074   | 8.71E+04  | 2.62     |
| U15 | 7-Methylguanine            | C6H7N5O     | 165.065   | 3.65E+05  | 2.76     |
| U16 | L-Leucine                  | C6H13NO2    | 131.095   | 1.13E+04  | 3.13     |
| U17 | Cotinine                   | C10H12N2O   | 176.095   | 1.50E+05  | 3.74     |
| U18 | Cyclic AMP                 | C10H12N5O6P | 329.053   | 3.87E+04  | 3.97     |
| U19 | Adenosine                  | C10H13N5O4  | 267.097   | 9.90E+04  | 4.09     |
| U20 | 1,9-Dimethyluric acid      | C7H8N4O3    | 196.06    | 8.91E+03  | 4.63     |
| U21 | L-Phenylalanine            | C9H11NO2    | 165.079   | 9.47E+04  | 4.72     |
| U22 | 2-Furoylglycine            | C7H7NO4     | 169.038   | 1.94E+05  | 4.83     |
| U23 | 2-Piperidinone             | C5H9NO      | 99.068    | 8.66E+04  | 5.08     |
| U24 | Pantothenic acid           | C9H17NO5    | 219.111   | 1.66E+05  | 5.39     |
| U25 | 1,3-Dimethyluric acid      | C7H8N4O3    | 196.06    | 3.27E+05  | 5.42     |
| U26 | Theobromine                | C7H8N4O2    | 180.065   | 4.33E+05  | 5.55     |
| U27 | L-Tryptophan               | C11H12N2O2  | 204.09    | 1.69E+05  | 6.14     |
| U28 | 5-Hydroxyindoleacetic acid | C10H9NO3    | 191.058   | 5.65E+04  | 6.78     |
| U29 | 1,3,7-Trimethyluric acid   | C8H10N4O3   | 210.075   | 5.82E+04  | 7.09     |
| U30 | 5'-Methylthioadenosine     | C11H15N5O3S | 297.09    | 1.80E+04  | 7.24     |
| U31 | Hippuric acid              | C9H9NO3     | 179.058   | 1.42E+06  | 7.25     |
| U32 | Indolelactic acid          | C11H11NO3   | 205.074   | 2.19E+04  | 9.66     |
| U33 | Indoleacetic acid          | C10H9NO2    | 175.063   | 7.43E+04  | 10.59    |
| U34 | Cortisone                  | C21H28O5    | 360.194   | 3.14E+04  | 13.24    |
| U35 | Androsterone               | C19H30O2    | 290.225   | 1.75E+04  | 16.07    |

Table S4: Annotation set used for the manual annotation of the standards mixture mass spectra, including PeakView data and XCMS pseudo-spectra. Mass differences are relative to the Molecular Weight.

| Adduct or Loss | mass diff |
|----------------|-----------|
| $[M+H-H_2O]^+$ | -17.003   |
| $[M+H-NH_3]^+$ | -16.019   |
| $[M+H]^+$      | 1.007     |
| $[2M+H]^+$     | 1.007     |
| $[3M+H]^+$     | 1.007     |
| $[M+NH_4]^+$   | 18.034    |
| $[M+Na]^+$     | 22.989    |
| $[2M+Na]^+$    | 22.989    |
| $[2M+K]^+$     | 38.963    |
| $[M+K]^+$      | 38.963    |
| $[M-H+2Na]^+$  | 44.971    |
| $[M+Na+K-H]^+$ | 60.945    |
| $[M+2K-H]^+$   | 76.919    |

Table S5: Default and optimised XCMS parameter settings obtained with IPO.

| Parameters          | Default | IPO 1  | IPO 2  |
|---------------------|---------|--------|--------|
| min_peakwidth:      | 5       | 14.5   | 7.3    |
| max_peakwidth:      | 20      | 30     | 35     |
| ppm:                | 15      | 42.5   | 35     |
| mzdiff:             | 10      | 0.0155 | -0.001 |
| snthresh:           | 6       | 53.65  | 1      |
| noise:              | 0       | 0      | 0      |
| prefilter:          | 3       | 3      | 4      |
| value_of_prefilter: | 100     | 100    | 1      |

Table S6: Detailed parameters used for XCMS and CAMERA for the comparative analysis of XCMS-based annotation tools.

| Tool   | Functions    | Arguments  | Values          |
|--------|--------------|------------|-----------------|
| XCMS   | xcmsSet      | method     | centwave        |
|        |              | polarity   | positive        |
|        |              | ppm        | 15              |
|        |              | snthresh   | 1/3/6/12/24     |
|        |              | peakwidth  | c(5,20)         |
|        |              | prefilter  | c(3,100)/c(0,0) |
| CAMERA | groupFWHM    | perfwhm    | 0.6             |
|        | groupCorr    | cor_eic_th | 0.75            |
|        | findIsotopes | mzabs      | 0.01            |
|        | findAdducts  | rules      | custom          |
|        |              | polarity   | positive        |
|        |              | mzabs      | 0.01            |

Table S7: Detailed parameters used for XCMS and CliqueMS for the comparative analysis of XCMS-based annotation tools.

| Tool     | Functions      | Arguments | Values          |
|----------|----------------|-----------|-----------------|
| XCMS     | findChromPeaks | method    | centwave        |
|          |                | polarity  | positive        |
|          |                | ppm       | 15              |
|          |                | snthresh  | 1/3/6/12/24     |
|          |                | peakwidth | c(5,20)         |
|          |                | prefilter | c(3,100)/c(0,0) |
| CLIQUEMS | getCliques     | filter    | TRUE            |
|          | getIsotopes    | ppm       | 10              |
|          | getAnnotation  | adinfo    | custom          |
|          |                | polarity  | positive        |
|          |                | ppm       | 10              |

Table S8: Detailed parameters used for XCMS, CAMERA and findMAIN for the comparative analysis of XCMS-based annotation tools.

| Tool     | Functions | Arguments | Values             |
|----------|-----------|-----------|--------------------|
| XCMS     | xcmsSet   | method    | centwave           |
|          |           | polarity  | positive           |
|          |           | ppm       | 15                 |
|          |           | snthresh  | 1/3/6/12/24        |
|          |           | peakwidth | c(5,20)            |
|          |           | prefilter | c(3,100)/c(0,0)    |
| CAMERA   | groupFWHM | perfwhm   | 0.6                |
| FINDMAIN | findMAIN  | adducthyp | [M+H] <sup>+</sup> |
|          |           | rules     | custom             |
|          |           | mzabs     | 0.01               |



Table S9: Detailed parameters used for XCMS, CAMERA and mzAdan for the comparative analysis of XCMS-based annotation tools.

| Tool   | Functions  | Arguments   | Values                 |         |
|--------|------------|-------------|------------------------|---------|
| XCMS   | xcmsSet    | method      | centwave               |         |
|        |            | polarity    | positive               |         |
|        |            | ppm         | 15                     |         |
|        |            | snthresh    | 1/3/6/12/24            |         |
|        |            | peakwidth   | c(5,20)                |         |
|        |            | prefilter   | c(3,100)/c(0,0)        |         |
|        |            | CAMERA      | groupFWHM              | perfwhm |
| MZADAN | parameters | int thresh. | disabled               |         |
|        |            | m/z thresh. | disabled               |         |
|        |            | deisotoping | 1-100                  |         |
|        |            | validation  | disabled               |         |
|        |            | annotations | adducts                | default |
|        |            | neutrals    | default                |         |
|        |            | isotopes    | disabled               |         |
|        |            | multimers   | 3                      |         |
|        |            | candidates  | candidate connectivity | 0       |

Table S10: Annotation set used with CAMERA for the comparative analysis of XCMS-based annotation tools.

| name                                | nmol | charge | massdiff | oidscore | quasi | ips  |
|-------------------------------------|------|--------|----------|----------|-------|------|
| [M+H-H <sub>2</sub> O] <sup>+</sup> | 1    | 1      | -17.0033 | 24       | 1     | 1    |
| [M+H-NH <sub>3</sub> ] <sup>+</sup> | 1    | 1      | -16.0193 | 16       | 1     | 1    |
| [M+H] <sup>+</sup>                  | 1    | 1      | 1.0073   | 1        | 1     | 1    |
| [2M+H] <sup>+</sup>                 | 2    | 1      | 1.0073   | 1        | 0     | 0.5  |
| [3M+H] <sup>+</sup>                 | 3    | 1      | 1.0073   | 1        | 0     | 0.25 |
| [M+NH <sub>4</sub> ] <sup>+</sup>   | 1    | 1      | 18.0338  | 16       | 1     | 1    |
| [M+Na] <sup>+</sup>                 | 1    | 1      | 22.9892  | 8        | 1     | 1    |
| [2M+Na] <sup>+</sup>                | 2    | 1      | 22.9892  | 8        | 0     | 0.5  |
| [M+K] <sup>+</sup>                  | 1    | 1      | 38.9632  | 10       | 1     | 1    |
| [2M+K] <sup>+</sup>                 | 2    | 1      | 38.9632  | 10       | 0     | 0.5  |
| [M+2Na-H] <sup>+</sup>              | 1    | 1      | 44.9712  | 34       | 0     | 0.5  |
| [M+2K-H] <sup>+</sup>               | 1    | 1      | 76.9190  | 60       | 0     | 0.5  |



Table S11: Annotation set used with *CliqueMS* for the comparative analysis of *XCMS*-based annotation tools.

| adduct         | log10freq    | massdiff | nummol | charge |
|----------------|--------------|----------|--------|--------|
| $[M+H-H_2O]^+$ | -0.747608492 | -17.003  | 1      | 1      |
| $[M+H-NH_3]^+$ | -1.588625136 | -16.019  | 1      | 1      |
| $[M+H]^+$      | -0.268998652 | 1.007    | 1      | 1      |
| $[2M+H]^+$     | -1.223984816 | 1.007    | 2      | 1      |
| $[3M+H]^+$     | -2.269866373 | 1.007    | 3      | 1      |
| $[M+NH_4]^+$   | -2.491715123 | 18.034   | 1      | 1      |
| $[M+Na]^+$     | -0.963288183 | 22.989   | 1      | 1      |
| $[2M+Na]^+$    | -2.968836378 | 22.989   | 2      | 1      |
| $[2M+K]^+$     | -3.813934418 | 38.963   | 2      | 1      |
| $[M+K]^+$      | -2.415994409 | 38.963   | 1      | 1      |
| $[M-H+2Na]^+$  | -1.859691908 | 44.971   | 1      | 1      |
| $[M-H+2K]^+$   | -3.114964413 | 76.919   | 1      | 1      |

Table S12: Annotation set used with *FindMAIN* for the comparative analysis of *XCMS*-based annotation tools.

| name           |
|----------------|
| $[M+H-H_2O]^+$ |
| $[M+H-NH_3]^+$ |
| $[M+H]^+$      |
| $[M+NH_4]^+$   |
| $[M+Na]^+$     |
| $[M+K]^+$      |
| $[M-H+2Na]^+$  |
| $[M-H+2K]^+$   |
| $[2M+H]^+$     |
| $[2M+K]^+$     |
| $[2M+Na]^+$    |
| $[3M+H]^+$     |

Table S13: Annotation set used with *mzAdan* for the comparative analysis of *XCMS*-based annotation tools.

| name               | value    |
|--------------------|----------|
| NH <sub>4</sub> -H | 17.0266  |
| Na-H               | 21.9820  |
| K-H                | 37.9559  |
| -NH <sub>3</sub>   | -17.0266 |
| -H <sub>2</sub> O  | -18.0106 |
| 2M                 | NA       |
| 3M                 | NA       |

Table S14: Candidate lists proposed by mzAdan for the data in Figures 2 and 3

1) Candidate list for LC-MS for the RT=1.35 min

| id | mass     | m/z      | int (cps) | int (%) | connectivity | cgc | cic   | ccc   |
|----|----------|----------|-----------|---------|--------------|-----|-------|-------|
| C0 | 115.0638 | 116.0711 | 54204     | 100     | 2            | 5   | 41.57 | 26.32 |
| C1 | 131.0697 | 132.077  | 22089     | 40.8    | 2            | 7   | 37.39 | 36.84 |
| C2 | 189.1122 | 190.1195 | 14690     | 27.1    | 3            | 6   | 20.16 | 31.58 |
| C2 | 172.0849 | 173.0922 | 2046      | 3.8     | 1            | 6   | 20.16 | 31.58 |
| C3 | 69.0575  | 70.0647  | 1266      | 2.3     | 0            | 1   | 0.88  | 5.26  |

2) Candidate list for flow injection analysis of L-proline

| id  | mass     | m/z      | int (cps) | int (%) | connectivity | cgc | cic   | ccc   |
|-----|----------|----------|-----------|---------|--------------|-----|-------|-------|
| C0  | 115.0628 | 116.0701 | 51394     | 100     | 1            | 13  | 61.12 | 39.39 |
| C1  | 69.0577  | 70.0649  | 18760     | 36.5    | 0            | 1   | 14.54 | 3.03  |
| C2  | 370.0926 | 371.0999 | 9943      | 19.4    | 1            | 2   | 8.13  | 6.06  |
| C2  | 387.1186 | 388.1259 | 543       | 1.1     | 1            | 2   | 8.13  | 6.06  |
| C3  | 78.0136  | 79.0209  | 6058      | 11.8    | 0            | 1   | 4.7   | 3.03  |
| C4  | 498.1976 | 499.2049 | 813       | 1.6     | 1            | 4   | 2.81  | 12.12 |
| C5  | 231.0311 | 232.0384 | 1708      | 3.3     | 1            | 2   | 2.32  | 6.06  |
| C6  | 199.0147 | 200.0219 | 1537      | 3       | 1            | 2   | 1.68  | 6.06  |
| C7  | 234.1608 | 235.1681 | 1613      | 3.1     | 0            | 1   | 1.25  | 3.03  |
| C8  | 354.0606 | 355.0679 | 979       | 1.9     | 0            | 1   | 0.76  | 3.03  |
| C9  | 337.3326 | 338.3399 | 774       | 1.5     | 0            | 1   | 0.6   | 3.03  |
| C10 | 321.0001 | 322.0073 | 572       | 1.1     | 0            | 1   | 0.44  | 3.03  |
| C11 | 268.0729 | 269.0802 | 546       | 1.1     | 0            | 1   | 0.42  | 3.03  |
| C12 | 147.9943 | 149.0016 | 544       | 1.1     | 0            | 1   | 0.42  | 3.03  |
| C13 | 119.9995 | 121.0068 | 525       | 1       | 0            | 1   | 0.41  | 3.03  |
| C14 | 527.101  | 528.1083 | 515       | 1       | 0            | 1   | 0.4   | 3.03  |

Table S15: Peak annotation summary for L-proline by FIA-MS analysis (Figure 3)

| <b>m/z</b> | <b>intensity</b> | <b>annotation</b>           | <b>exact mas</b> | <b>error mmu</b> |
|------------|------------------|-----------------------------|------------------|------------------|
| 116.0701   | 51394            | [M+H] <sup>+</sup>          | 116.0706         | -0.6             |
| 138.0521   | 7142             | [M+Na] <sup>+</sup>         | 138.0526         | -0.5             |
| 160.0336   | 5423             | [M+2Na-H] <sup>+</sup>      | 160.0345         | -0.9             |
| 253.1148   | 3536             | [2M+Na] <sup>+</sup>        | 253.1159         | -1.1             |
| 275.0964   | 1564             | [2M+2Na-H] <sup>+</sup>     | 275.0978         | -1.4             |
| 297.0783   | 1476             | [2M+3Na-2H] <sup>+</sup>    | 297.0798         | -1.4             |
| 368.1772   | 1576             | [3M+Na] <sup>+</sup>        | 368.1792         | -2               |
| 384.1424   | 1259             | [3M+K] <sup>+</sup>         | 384.1532         | -10.7            |
|            |                  | [3M+Ca-H] <sup>+</sup>      | 384.1442         | -1.8             |
| 390.1589   | 1001             | [3M+2Na-H] <sup>+</sup>     | 390.1612         | -2.3             |
|            |                  |                             |                  |                  |
| 406.1240   | 1665             | [3M+Na+K-H] <sup>+</sup>    | 406.1351         | -11.1            |
|            |                  | [3M+Na+Ca-2H] <sup>+</sup>  | 406.1262         | -2.2             |
| 412.1404   | 702              | [3M+3Na-2H] <sup>+</sup>    | 412.1431         | -2.7             |
| 428.1057   | 1048             | [3M+2Na+K-2H] <sup>+</sup>  | 428.1170         | -11.3            |
|            |                  | [3M+2Na+Ca-3H] <sup>+</sup> | 428.1081         | -2.4             |
| 434.1223   | 1057             | [3M+4Na-3H] <sup>+</sup>    | 434.1250         | -2.8             |
|            |                  |                             |                  |                  |
| 499.2049   | 813              | [4M+Ca-H] <sup>+</sup>      | 499.2075         | -2.6             |
| 521.1866   | 1277             | [4M+Na+Ca-2H] <sup>+</sup>  | 521.1895         | -2.9             |
| 543.1685   | 905              | [4M+2Na+Ca-3H] <sup>+</sup> | 543.1714         | -2.9             |
| 565.1498   | 626              | [4M+3Na+Ca-4H] <sup>+</sup> | 565.1534         | -3.6             |

Table S16: Relative intensities of the 13 adducts (including protonated forms) of the LC/MS analysis of the 52 analyte mix. Mass spectra were generated with PeakView (average at FWHM and background subtracted). Only annotations with correct retention times were considered (mzAdan and XIC).

| ID  | RT (min) | [M+H-H <sub>2</sub> O] <sup>+</sup> | [M+H-NH <sub>3</sub> ] <sup>+</sup> | [M+H] <sup>+</sup> | [M+NH <sub>4</sub> ] <sup>+</sup> | [M+Na] <sup>+</sup> | [M+2Na-H] <sup>+</sup> | [M+Na+K-H] <sup>+</sup> | [M+K] <sup>+</sup> | [M+2K-H] <sup>+</sup> | [2M+H] <sup>+</sup> | [2M+Na] <sup>+</sup> | [2M+K] <sup>+</sup> | [3M+H] <sup>+</sup> |
|-----|----------|-------------------------------------|-------------------------------------|--------------------|-----------------------------------|---------------------|------------------------|-------------------------|--------------------|-----------------------|---------------------|----------------------|---------------------|---------------------|
| M1  | 1.12     | 0                                   | 27.1                                | 100                | 0                                 | 0                   | 0                      | 6.5                     | 10.2               | 4.4                   | 0                   | 0                    | 0                   | 0                   |
| M2  | 1.15     | 0                                   | 0                                   | 100                | 0                                 | 11.1                | 1.9                    | 5.9                     | 10.5               | 5.8                   | 0                   | 0                    | 0                   | 0                   |
| M3  | 1.16     | 0                                   | 1.6                                 | 45.8               | 0                                 | 3.1                 | 0                      | 0                       | 7.8                | 1.4                   | 0                   | 0                    | 0                   | 0                   |
| M4  | 1.17     | 0                                   | 0                                   | 94.1               | 0                                 | 3                   | 0                      | 0                       | 4.9                | 0                     | 0                   | 0                    | 0                   | 0                   |
| M5  | 1.19     | 0                                   | 0                                   | 26.4               | 0                                 | 0                   | 0                      | 0                       | 0                  | 0                     | 0                   | 0                    | 0                   | 0                   |
| M6  | 1.20     | 0                                   | 0                                   | 100                | 0                                 | 0                   | 0                      | 0                       | 11.5               | 0                     | 0                   | 0                    | 0                   | 0                   |
| M7  | 1.21     | 0                                   | 20.7                                | 38                 | 0                                 | 1.1                 | 0                      | 0                       | 5.8                | 2.6                   | 0                   | 0                    | 0                   | 0                   |
| M8  | 1.22     | 0                                   | 0                                   | 19.5               | 0                                 | 0                   | 0                      | 0                       | 1.7                | 0                     | 0                   | 0                    | 0                   | 0                   |
| M9  | 1.25     | 0                                   | 0                                   | 100                | 0                                 | 0                   | 0                      | 0                       | 9                  | 0                     | 5.4                 | 0                    | 0                   | 0                   |
| M10 | 1.26     | 0                                   | 0                                   | 33.5               | 0                                 | 0                   | 0                      | 0                       | 0                  | 0                     | 0                   | 0                    | 0                   | 0                   |
| M11 | 1.27     | 0                                   | 0                                   | 32.7               | 0                                 | 0                   | 0                      | 0                       | 0                  | 0                     | 0                   | 0                    | 0                   | 0                   |
| M12 | 1.27     | 5.1                                 | 0                                   | 19.7               | 0                                 | 0                   | 0                      | 0                       | 5.9                | 0                     | 0                   | 0                    | 0                   | 0                   |
| M13 | 1.30     | 0                                   | 0                                   | 100                | 0                                 | 0                   | 0                      | 0                       | 8.5                | 0                     | 0                   | 0                    | 0                   | 0                   |
| M14 | 1.31     | 0                                   | 0                                   | 61.4               | 0                                 | 1.7                 | 0                      | 0                       | 15.4               | 0                     | 13.7                | 1.3                  | 1.9                 | 0                   |
| M15 | 1.34     | 0                                   | 0                                   | 42.2               | 0                                 | 0                   | 0                      | 0                       | 6.3                | 0                     | 0                   | 0                    | 0                   | 0                   |
| M16 | 1.35     | 0                                   | 0                                   | 100                | 0                                 | 0                   | 0                      | 0                       | 5.1                | 2                     | 2                   | 0                    | 0                   | 0                   |
| M17 | 1.38     | 0                                   | 9.9                                 | 70                 | 0                                 | 2.8                 | 0                      | 0                       | 45.3               | 4.3                   | 0                   | 0                    | 0                   | 0                   |
| M18 | 1.56     | 0                                   | 8.5                                 | 100                | 0                                 | 0                   | 0                      | 0                       | 1.9                | 0                     | 0                   | 0                    | 0                   | 0                   |
| M19 | 1.82     | 0                                   | 0                                   | 100                | 0                                 | 1.3                 | 0                      | 0                       | 6                  | 0                     | 0                   | 0                    | 0                   | 0                   |
| M20 | 1.88     | 0                                   | 0                                   | 100                | 0                                 | 0                   | 0                      | 0                       | 2.6                | 0                     | 0                   | 0                    | 0                   | 0                   |
| M21 | 1.98     | 0                                   | 0                                   | 100                | 0                                 | 0                   | 0                      | 0                       | 0                  | 0                     | 0                   | 0                    | 0                   | 0                   |
| M22 | 2.08     | 1.6                                 | 0                                   | 100                | 0                                 | 0                   | 0                      | 0                       | 0                  | 0                     | 0                   | 0                    | 0                   | 0                   |
| M23 | 2.37     | 0                                   | 0                                   | 100                | 0                                 | 0                   | 0                      | 0                       | 1.6                | 0                     | 0                   | 0                    | 0                   | 0                   |
| M24 | 2.94     | 0                                   | 0                                   | 100                | 0                                 | 3.7                 | 0                      | 0                       | 25.7               | 1.9                   | 3.6                 | 0                    | 0                   | 0                   |
| M25 | 3.33     | 0                                   | 100                                 | 36.9               | 0                                 | 0                   | 0                      | 0                       | 0                  | 0                     | 0                   | 0                    | 0                   | 0                   |
| M26 | 3.86     | 0                                   | 0                                   | 100                | 0                                 | 0                   | 0                      | 0                       | 6.8                | 0                     | 0                   | 0                    | 0                   | 0                   |
| M27 | 4.00     | 0                                   | 0                                   | 83.2               | 0                                 | 0                   | 0                      | 0                       | 36.1               | 0                     | 0                   | 0                    | 0                   | 0                   |
| M28 | 4.25     | 0                                   | 0                                   | 100                | 0                                 | 0                   | 0                      | 0                       | 11.5               | 2.2                   | 0                   | 0                    | 0                   | 0                   |
| M29 | 4.58     | 0                                   | 0                                   | 100                | 0                                 | 4.6                 | 0                      | 0                       | 35.6               | 0                     | 0                   | 0                    | 0                   | 0                   |
| M30 | 4.83     | 0                                   | 0                                   | 100                | 0                                 | 0                   | 0                      | 0                       | 0                  | 0                     | 0                   | 0                    | 0                   | 0                   |
| M31 | 5.33     | 0                                   | 0                                   | 100                | 0                                 | 0                   | 0                      | 0                       | 3.5                | 1.1                   | 1.9                 | 0                    | 0                   | 0                   |
| M32 | 5.70     | 0                                   | 0                                   | 92.2               | 0                                 | 7.1                 | 0                      | 0                       | 0                  | 0                     | 0                   | 0                    | 0                   | 0                   |
| M33 | 5.75     | 0                                   | 0                                   | 100                | 0                                 | 5.6                 | 0                      | 0                       | 15.8               | 0                     | 0                   | 0                    | 0                   | 0                   |
| M34 | 5.79     | 0                                   | 0                                   | 100                | 0                                 | 0                   | 0                      | 0                       | 0                  | 0                     | 0                   | 0                    | 0                   | 0                   |
| M35 | 5.93     | 0                                   | 0                                   | 100                | 0                                 | 0                   | 0                      | 0                       | 0                  | 0                     | 0                   | 0                    | 0                   | 0                   |
| M36 | 7.01     | 0                                   | 0                                   | 100                | 0                                 | 12.2                | 0                      | 2.5                     | 40.7               | 12.2                  | 0                   | 0                    | 0                   | 0                   |
| M37 | 7.06     | 0                                   | 0                                   | 100                | 0                                 | 2.6                 | 0                      | 0                       | 23.5               | 2.7                   | 0                   | 0                    | 0                   | 0                   |

|     |       |      |   |      |      |      |   |     |      |     |   |   |   |   |
|-----|-------|------|---|------|------|------|---|-----|------|-----|---|---|---|---|
| M38 | 7.57  | 100  | 0 | 20   | 0    | 6.3  | 0 | 1.5 | 9.7  | 6.1 | 0 | 0 | 0 | 0 |
| M39 | 7.59  | 0    | 0 | 28.8 | 0    | 0    | 0 | 0   | 0    | 0   | 0 | 0 | 0 | 0 |
| M40 | 7.62  | 0    | 0 | 100  | 3.5  | 2.8  | 0 | 0   | 40.8 | 0   | 0 | 0 | 0 | 0 |
| M41 | 7.67  | 0    | 0 | 100  | 0    | 10.8 | 0 | 2   | 37.9 | 6.7 | 0 | 0 | 0 | 0 |
| M42 | 7.68  | 0    | 0 | 13.9 | 0    | 0    | 0 | 0   | 0    | 0   | 0 | 0 | 0 | 0 |
| M43 | 7.93  | 2.9  | 0 | 100  | 0    | 2.3  | 0 | 0   | 4.8  | 1.1 | 0 | 0 | 0 | 0 |
| M44 | 8.53  | 0    | 0 | 100  | 0    | 6.8  | 0 | 1.9 | 51.2 | 6.5 | 0 | 0 | 0 | 0 |
| M45 | 9.55  | 0    | 0 | 100  | 0    | 3    | 0 | 0   | 31.8 | 0   | 0 | 0 | 0 | 0 |
| M46 | 10.36 | 7.5  | 0 | 100  | 0    | 9.5  | 0 | 2.4 | 51.6 | 7.8 | 0 | 0 | 0 | 0 |
| M47 | 11.38 | 0    | 0 | 100  | 0    | 5.3  | 0 | 0   | 21.5 | 4.4 | 0 | 0 | 0 | 0 |
| M48 | 12.86 | 67.2 | 0 | 62.4 | 85.1 | 34.2 | 0 | 5.1 | 100  | 9.3 | 0 | 0 | 0 | 0 |
| M49 | 14.23 | 0    | 0 | 100  | 0    | 0    | 0 | 0   | 14.9 | 0   | 0 | 0 | 0 | 0 |
| M50 | 14.43 | 0    | 0 | 100  | 0    | 3    | 0 | 0   | 24.6 | 0   | 0 | 0 | 0 | 0 |
| M51 | 17.36 | 9.4  | 0 | 8.5  | 100  | 3.8  | 0 | 1.1 | 13.5 | 1.5 | 0 | 0 | 0 | 0 |
| M52 | 18.34 | 16.3 | 0 | 100  | 95.6 | 13.4 | 0 | 0   | 27.8 | 0   | 0 | 0 | 0 | 0 |

Table S17: Relative intensities of the 13 adducts (including protonated forms) following manual annotation of the standards mixture mass spectra with features detected using XCMS with the recommended parameters, and pseudo-mass spectra were generated with CAMERA.

| ID  | RT (min) | [M+H-H2O] <sup>+</sup> | [M+H-NH3] <sup>+</sup> | [M+H] <sup>+</sup> | [M+NH4] <sup>+</sup> | [M+Na] <sup>+</sup> | [M+2Na-H] <sup>+</sup> | [M+Na+K-H] <sup>+</sup> | [M+K] <sup>+</sup> | [M+2K-H] <sup>+</sup> | [2M+H] <sup>+</sup> | [2M+Na] <sup>+</sup> | [2M+K] <sup>+</sup> | [3M+H] <sup>+</sup> |
|-----|----------|------------------------|------------------------|--------------------|----------------------|---------------------|------------------------|-------------------------|--------------------|-----------------------|---------------------|----------------------|---------------------|---------------------|
| M1  | 1.12     | 0                      | 0                      | 100                | 0                    | 0                   | 0                      | 0                       | 0                  | 0                     | 0                   | 0                    | 0                   | 0                   |
| M2  | 1.15     | 0                      | 0                      | 100                | 0                    | 0                   | 0                      | 0                       | 0                  | 0                     | 0                   | 0                    | 0                   | 0                   |
| M3  | 1.16     | 0                      | 0                      | 59                 | 0                    | 0                   | 0                      | 0                       | 0                  | 0                     | 0                   | 0                    | 0                   | 0                   |
| M4  | 1.17     | 0                      | 0                      | 100                | 0                    | 0                   | 0                      | 0                       | 0                  | 0                     | 0                   | 0                    | 0                   | 0                   |
| M5  | 1.2      | 0                      | 0                      | 25.8               | 0                    | 0                   | 0                      | 0                       | 0                  | 0                     | 0                   | 0                    | 0                   | 0                   |
| M6  | 1.2      | 0                      | 0                      | 100                | 0                    | 0                   | 0                      | 0                       | 14                 | 0                     | 0                   | 0                    | 0                   | 0                   |
| M7  | 1.21     | 0                      | 14.4                   | 28.3               | 0                    | 0                   | 0                      | 0                       | 0                  | 0                     | 0                   | 0                    | 0                   | 0                   |
| M8  | 1.22     | 0                      | 0                      | 100                | 0                    | 0                   | 0                      | 0                       | 0                  | 0                     | 0                   | 0                    | 0                   | 0                   |
| M9  | 1.25     | 0                      | 0                      | 100                | 0                    | 0                   | 0                      | 0                       | 14.1               | 0                     | 13.3                | 0                    | 0                   | 0                   |
| M10 | 1.26     | 0                      | 0                      | 46.5               | 0                    | 0                   | 0                      | 0                       | 0                  | 0                     | 0                   | 0                    | 0                   | 0                   |
| M11 | 1.27     | 0                      | 0                      | 44.4               | 0                    | 0                   | 0                      | 0                       | 0                  | 0                     | 0                   | 0                    | 0                   | 0                   |
| M12 | 1.27     | 0                      | 0                      | 100                | 0                    | 0                   | 0                      | 0                       | 33.9               | 0                     | 0                   | 0                    | 0                   | 0                   |
| M13 | 1.3      | 0                      | 0                      | 100                | 0                    | 0                   | 0                      | 0                       | 0                  | 0                     | 0                   | 0                    | 0                   | 0                   |
| M14 | 1.31     | 0                      | 0                      | 80                 | 0                    | 0                   | 0                      | 0                       | 21.1               | 0                     | 21.5                | 0                    | 0                   | 0                   |
| M15 | 1.34     | 0                      | 0                      | 44.9               | 0                    | 0                   | 0                      | 0                       | 0                  | 0                     | 0                   | 0                    | 0                   | 0                   |
| M16 | 1.35     | 0                      | 0                      | 100                | 0                    | 0                   | 0                      | 0                       | 0                  | 0                     | 0                   | 0                    | 0                   | 0                   |
| M17 | 1.38     | 0                      | 0                      | 100                | 0                    | 0                   | 0                      | 0                       | 74.5               | 0                     | 0                   | 0                    | 0                   | 0                   |
| M18 | 1.56     | 0                      | 81.1                   | 100                | 0                    | 0                   | 0                      | 0                       | 0                  | 0                     | 0                   | 0                    | 0                   | 0                   |
| M19 | 1.82     | 0                      | 0                      | 100                | 0                    | 0                   | 0                      | 0                       | 0                  | 0                     | 0                   | 0                    | 0                   | 0                   |
| M20 | 1.88     | 0                      | 0                      | 100                | 0                    | 0                   | 0                      | 0                       | 0                  | 0                     | 0                   | 0                    | 0                   | 0                   |
| M21 | 1.98     | 0                      | 0                      | 100                | 0                    | 0                   | 0                      | 0                       | 0                  | 0                     | 0                   | 0                    | 0                   | 0                   |
| M22 | 2.08     | 0                      | 0                      | 100                | 0                    | 0                   | 0                      | 0                       | 0                  | 0                     | 0                   | 0                    | 0                   | 0                   |
| M23 | 2.37     | 0                      | 0                      | 100                | 0                    | 0                   | 0                      | 0                       | 0                  | 0                     | 0                   | 0                    | 0                   | 0                   |
| M24 | 2.94     | 0                      | 0                      | 100                | 0                    | 0                   | 0                      | 0                       | 31.2               | 0                     | 0                   | 0                    | 0                   | 0                   |
| M25 | 3.33     | 0                      | 100                    | 43.9               | 0                    | 0                   | 0                      | 0                       | 0                  | 0                     | 0                   | 0                    | 0                   | 0                   |
| M26 | 3.86     | 0                      | 0                      | 100                | 0                    | 0                   | 0                      | 0                       | 0                  | 0                     | 0                   | 0                    | 0                   | 0                   |
| M27 | 4        | 0                      | 0                      | 65.2               | 0                    | 0                   | 0                      | 0                       | 33.1               | 0                     | 0                   | 0                    | 0                   | 0                   |
| M28 | 4.25     | 0                      | 0                      | 100                | 0                    | 0                   | 0                      | 0                       | 0                  | 0                     | 0                   | 0                    | 0                   | 0                   |
| M29 | 4.58     | 0                      | 0                      | 100                | 0                    | 0                   | 0                      | 0                       | 43.5               | 0                     | 0                   | 0                    | 0                   | 0                   |
| M30 | 4.83     | 0                      | 0                      | 0                  | 0                    | 0                   | 0                      | 0                       | 0                  | 0                     | 0                   | 0                    | 0                   | 0                   |
| M31 | 5.34     | 0                      | 0                      | 100                | 0                    | 0                   | 0                      | 0                       | 0                  | 0                     | 0                   | 0                    | 0                   | 0                   |
| M32 | 5.7      | 0                      | 0                      | 100                | 0                    | 0                   | 0                      | 0                       | 67.7               | 0                     | 0                   | 0                    | 0                   | 0                   |
| M33 | 5.75     | 0                      | 0                      | 100                | 0                    | 0                   | 0                      | 0                       | 19.8               | 0                     | 0                   | 0                    | 0                   | 0                   |
| M34 | 5.79     | 0                      | 0                      | 100                | 0                    | 0                   | 0                      | 0                       | 0                  | 0                     | 0                   | 0                    | 0                   | 0                   |
| M35 | 5.93     | 0                      | 0                      | 100                | 0                    | 0                   | 0                      | 0                       | 0                  | 0                     | 0                   | 0                    | 0                   | 0                   |
| M36 | 7.01     | 0                      | 0                      | 100                | 0                    | 0                   | 0                      | 0                       | 52.6               | 0                     | 0                   | 0                    | 0                   | 0                   |

|     |       |      |   |      |      |      |   |   |      |   |   |   |   |   |
|-----|-------|------|---|------|------|------|---|---|------|---|---|---|---|---|
| M37 | 7.06  | 0    | 0 | 100  | 0    | 0    | 0 | 0 | 0    | 0 | 0 | 0 | 0 | 0 |
| M38 | 7.57  | 100  | 0 | 23.7 | 0    | 0    | 0 | 0 | 0    | 0 | 0 | 0 | 0 | 0 |
| M39 | 7.59  | 0    | 0 | 100  | 0    | 0    | 0 | 0 | 0    | 0 | 0 | 0 | 0 | 0 |
| M40 | 7.62  | 0    | 0 | 100  | 0    | 0    | 0 | 0 | 48.8 | 0 | 0 | 0 | 0 | 0 |
| M41 | 7.67  | 0    | 0 | 100  | 0    | 0    | 0 | 0 | 49.5 | 0 | 0 | 0 | 0 | 0 |
| M42 | 7.68  | 0    | 0 | 0    | 0    | 0    | 0 | 0 | 0    | 0 | 0 | 0 | 0 | 0 |
| M43 | 7.93  | 0    | 0 | 100  | 0    | 0    | 0 | 0 | 0    | 0 | 0 | 0 | 0 | 0 |
| M44 | 8.53  | 0    | 0 | 100  | 0    | 0    | 0 | 0 | 76.5 | 0 | 0 | 0 | 0 | 0 |
| M45 | 9.55  | 0    | 0 | 100  | 0    | 0    | 0 | 0 | 34.8 | 0 | 0 | 0 | 0 | 0 |
| M46 | 10.36 | 0    | 0 | 100  | 0    | 0    | 0 | 0 | 58.9 | 0 | 0 | 0 | 0 | 0 |
| M47 | 11.38 | 0    | 0 | 55   | 0    | 0    | 0 | 0 | 0    | 0 | 0 | 0 | 0 | 0 |
| M48 | 12.86 | 47.3 | 0 | 42.2 | 55.2 | 24.9 | 0 | 0 | 74.3 | 0 | 0 | 0 | 0 | 0 |
| M49 | 14.23 | 0    | 0 | 43.9 | 0    | 0    | 0 | 0 | 0    | 0 | 0 | 0 | 0 | 0 |
| M50 | 14.43 | 0    | 0 | 100  | 0    | 0    | 0 | 0 | 28.6 | 0 | 0 | 0 | 0 | 0 |
| M51 | 17.36 | 9.7  | 0 | 9.9  | 100  | 4.8  | 0 | 0 | 15.8 | 0 | 0 | 0 | 0 | 0 |
| M52 | 18.34 | 0    | 0 | 100  | 98.6 | 0    | 0 | 0 | 32.7 | 0 | 0 | 0 | 0 | 0 |

Table S18: Number of features corresponding to known analytes or adducts detected in the standards mixture with XCMS.

Different values for parameters such as *m/z* tolerance in ppm (*t*) or peakwidth (*pw*) were used; prefilters were either enabled and set to their default values or entirely disabled (*nf*).

| Parameters  | Analytes | Annotations |
|-------------|----------|-------------|
| default     | 50       | 33          |
| t10         | 50       | 33          |
| t20         | 50       | 35          |
| pw(5,15)    | 50       | 33          |
| pw(5,25)    | 50       | 33          |
| default-nf  | 52       | 162         |
| t10-nf      | 52       | 162         |
| t20-nf      | 52       | 161         |
| pw(5,15-nf) | 52       | 162         |
| pw(5,25)-nf | 52       | 161         |

Different values for parameters, such as signal-to-noise (*sn1*-*sn24*) and prefilters were used; the latter were either enabled and set to their default values or entirely disabled (*nf*).

| Parameters | Analytes | Annotations |
|------------|----------|-------------|
| sn24       | 50       | 32          |
| sn12       | 50       | 32          |
| default    | 50       | 33          |
| sn3        | 50       | 33          |
| sn1        | 50       | 33          |
| sn24-nf    | 52       | 93          |
| sn12-nf    | 52       | 132         |
| default-nf | 52       | 161         |
| sn3-nf     | 52       | 195         |
| sn1-nf     | 52       | 214         |



Table S19: Peak picking results for the standard mixture using XCMS with various signal-to-noise thresholds (sn1-sn24), and prefilters either enabled and set to their default values or entirely disabled (nf).

Detected analytes are represented by a (1), while (0) signifies that the feature corresponding to the protonated form of the analyte was not found.

| ID  | RT (min) | SN24 | SN12 | SN6 | SN3 | SN1 | SN24-NF | SN12-NF | SN6-NF | SN3-NF | SN1-NF |
|-----|----------|------|------|-----|-----|-----|---------|---------|--------|--------|--------|
| M1  | 1.12     | 1    | 1    | 1   | 1   | 1   | 1       | 1       | 1      | 1      | 1      |
| M2  | 1.15     | 1    | 1    | 1   | 1   | 1   | 1       | 1       | 1      | 1      | 1      |
| M3  | 1.16     | 1    | 1    | 1   | 1   | 1   | 1       | 1       | 1      | 1      | 1      |
| M4  | 1.17     | 1    | 1    | 1   | 1   | 1   | 1       | 1       | 1      | 1      | 1      |
| M5  | 1.2      | 1    | 1    | 1   | 1   | 1   | 1       | 1       | 1      | 1      | 1      |
| M6  | 1.2      | 1    | 1    | 1   | 1   | 1   | 1       | 1       | 1      | 1      | 1      |
| M7  | 1.21     | 1    | 1    | 1   | 1   | 1   | 1       | 1       | 1      | 1      | 1      |
| M8  | 1.22     | 1    | 1    | 1   | 1   | 1   | 1       | 1       | 1      | 1      | 1      |
| M9  | 1.25     | 1    | 1    | 1   | 1   | 1   | 1       | 1       | 1      | 1      | 1      |
| M10 | 1.26     | 1    | 1    | 1   | 1   | 1   | 1       | 1       | 1      | 1      | 1      |
| M11 | 1.27     | 1    | 1    | 1   | 1   | 1   | 1       | 1       | 1      | 1      | 1      |
| M12 | 1.27     | 1    | 1    | 1   | 1   | 1   | 1       | 1       | 1      | 1      | 1      |
| M13 | 1.3      | 1    | 1    | 1   | 1   | 1   | 1       | 1       | 1      | 1      | 1      |
| M14 | 1.31     | 1    | 1    | 1   | 1   | 1   | 1       | 1       | 1      | 1      | 1      |
| M15 | 1.34     | 1    | 1    | 1   | 1   | 1   | 1       | 1       | 1      | 1      | 1      |
| M16 | 1.35     | 1    | 1    | 1   | 1   | 1   | 1       | 1       | 1      | 1      | 1      |
| M17 | 1.38     | 1    | 1    | 1   | 1   | 1   | 1       | 1       | 1      | 1      | 1      |
| M18 | 1.56     | 1    | 1    | 1   | 1   | 1   | 1       | 1       | 1      | 1      | 1      |
| M19 | 1.82     | 1    | 1    | 1   | 1   | 1   | 1       | 1       | 1      | 1      | 1      |
| M20 | 1.88     | 1    | 1    | 1   | 1   | 1   | 1       | 1       | 1      | 1      | 1      |
| M21 | 1.98     | 1    | 1    | 1   | 1   | 1   | 1       | 1       | 1      | 1      | 1      |
| M22 | 2.08     | 1    | 1    | 1   | 1   | 1   | 1       | 1       | 1      | 1      | 1      |
| M23 | 2.37     | 1    | 1    | 1   | 1   | 1   | 1       | 1       | 1      | 1      | 1      |
| M24 | 2.94     | 1    | 1    | 1   | 1   | 1   | 1       | 1       | 1      | 1      | 1      |
| M25 | 3.33     | 1    | 1    | 1   | 1   | 1   | 1       | 1       | 1      | 1      | 1      |
| M26 | 3.86     | 1    | 1    | 1   | 1   | 1   | 1       | 1       | 1      | 1      | 1      |
| M27 | 4        | 1    | 1    | 1   | 1   | 1   | 1       | 1       | 1      | 1      | 1      |
| M28 | 4.25     | 1    | 1    | 1   | 1   | 1   | 1       | 1       | 1      | 1      | 1      |
| M29 | 4.58     | 1    | 1    | 1   | 1   | 1   | 1       | 1       | 1      | 1      | 1      |
| M30 | 4.83     | 0    | 0    | 0   | 0   | 0   | 1       | 1       | 1      | 1      | 1      |
| M31 | 5.34     | 1    | 1    | 1   | 1   | 1   | 1       | 1       | 1      | 1      | 1      |
| M32 | 5.7      | 1    | 1    | 1   | 1   | 1   | 1       | 1       | 1      | 1      | 1      |
| M33 | 5.75     | 1    | 1    | 1   | 1   | 1   | 1       | 1       | 1      | 1      | 1      |
| M34 | 5.79     | 1    | 1    | 1   | 1   | 1   | 1       | 1       | 1      | 1      | 1      |
| M35 | 5.93     | 1    | 1    | 1   | 1   | 1   | 1       | 1       | 1      | 1      | 1      |
| M36 | 7.01     | 1    | 1    | 1   | 1   | 1   | 1       | 1       | 1      | 1      | 1      |
| M37 | 7.06     | 1    | 1    | 1   | 1   | 1   | 1       | 1       | 1      | 1      | 1      |

|     |       |   |   |   |   |   |   |   |   |   |   |
|-----|-------|---|---|---|---|---|---|---|---|---|---|
| M38 | 7.57  | 1 | 1 | 1 | 1 | 1 | 1 | 1 | 1 | 1 | 1 |
| M39 | 7.59  | 1 | 1 | 1 | 1 | 1 | 1 | 1 | 1 | 1 | 1 |
| M40 | 7.62  | 1 | 1 | 1 | 1 | 1 | 1 | 1 | 1 | 1 | 1 |
| M41 | 7.67  | 1 | 1 | 1 | 1 | 1 | 1 | 1 | 1 | 1 | 1 |
| M42 | 7.68  | 0 | 0 | 0 | 0 | 0 | 1 | 1 | 1 | 1 | 1 |
| M43 | 7.93  | 1 | 1 | 1 | 1 | 1 | 1 | 1 | 1 | 1 | 1 |
| M44 | 8.53  | 1 | 1 | 1 | 1 | 1 | 1 | 1 | 1 | 1 | 1 |
| M45 | 9.55  | 1 | 1 | 1 | 1 | 1 | 1 | 1 | 1 | 1 | 1 |
| M46 | 10.36 | 1 | 1 | 1 | 1 | 1 | 1 | 1 | 1 | 1 | 1 |
| M47 | 11.38 | 1 | 1 | 1 | 1 | 1 | 1 | 1 | 1 | 1 | 1 |
| M48 | 12.86 | 1 | 1 | 1 | 1 | 1 | 1 | 1 | 1 | 1 | 1 |
| M49 | 14.23 | 1 | 1 | 1 | 1 | 1 | 1 | 1 | 1 | 1 | 1 |
| M50 | 14.43 | 1 | 1 | 1 | 1 | 1 | 1 | 1 | 1 | 1 | 1 |
| M51 | 17.36 | 1 | 1 | 1 | 1 | 1 | 1 | 1 | 1 | 1 | 1 |
| M52 | 18.34 | 1 | 1 | 1 | 1 | 1 | 1 | 1 | 1 | 1 | 1 |

Table S20: Summary of the annotation of the standards mixture using XCMS-CAMERA with various signal-to-noise thresholds (sn1-sn24), and prefilters either enabled and set to their default values or entirely disabled (nf).

Correctly annotated analytes are represented by a (1), while (0) signifies that the compound was either not detected, not annotated or incorrectly annotated.

| ID  | RT (min) | SN24 | SN12 | SN6 | SN3 | SN1 | SN24-NF | SN12-NF | SN6-NF | SN3-NF | SN1-NF |
|-----|----------|------|------|-----|-----|-----|---------|---------|--------|--------|--------|
| M1  | 1.12     | 0    | 0    | 0   | 0   | 0   | 1       | 1       | 1      | 1      | 1      |
| M2  | 1.15     | 0    | 0    | 0   | 0   | 0   | 1       | 1       | 1      | 1      | 1      |
| M3  | 1.16     | 0    | 0    | 0   | 0   | 0   | 1       | 1       | 1      | 1      | 1      |
| M4  | 1.17     | 0    | 0    | 0   | 0   | 0   | 1       | 0       | 0      | 1      | 1      |
| M5  | 1.2      | 0    | 0    | 0   | 0   | 0   | 0       | 0       | 0      | 1      | 1      |
| M6  | 1.2      | 1    | 1    | 1   | 1   | 1   | 1       | 1       | 1      | 1      | 1      |
| M7  | 1.21     | 1    | 1    | 1   | 1   | 1   | 1       | 1       | 1      | 1      | 0      |
| M8  | 1.22     | 0    | 0    | 0   | 0   | 0   | 1       | 1       | 1      | 1      | 1      |
| M9  | 1.25     | 1    | 1    | 1   | 1   | 1   | 1       | 1       | 1      | 1      | 1      |
| M10 | 1.26     | 0    | 0    | 0   | 0   | 0   | 0       | 0       | 0      | 0      | 0      |
| M11 | 1.27     | 0    | 0    | 0   | 0   | 0   | 0       | 0       | 0      | 0      | 0      |
| M12 | 1.27     | 1    | 1    | 1   | 1   | 1   | 1       | 1       | 1      | 1      | 1      |
| M13 | 1.3      | 0    | 0    | 0   | 0   | 0   | 0       | 0       | 0      | 0      | 0      |
| M14 | 1.31     | 1    | 1    | 1   | 1   | 1   | 1       | 1       | 1      | 1      | 1      |
| M15 | 1.34     | 0    | 0    | 0   | 0   | 0   | 0       | 0       | 0      | 0      | 0      |
| M16 | 1.35     | 0    | 0    | 0   | 0   | 0   | 1       | 1       | 1      | 1      | 1      |
| M17 | 1.38     | 1    | 1    | 1   | 1   | 1   | 1       | 1       | 1      | 1      | 1      |
| M18 | 1.56     | 0    | 0    | 1   | 1   | 1   | 0       | 1       | 1      | 1      | 1      |
| M19 | 1.82     | 0    | 0    | 0   | 0   | 0   | 1       | 1       | 1      | 1      | 1      |
| M20 | 1.88     | 0    | 0    | 0   | 0   | 0   | 1       | 1       | 1      | 1      | 1      |
| M21 | 1.98     | 0    | 0    | 0   | 0   | 0   | 0       | 0       | 1      | 1      | 1      |
| M22 | 2.08     | 0    | 0    | 0   | 0   | 0   | 0       | 1       | 1      | 1      | 1      |
| M23 | 2.37     | 0    | 0    | 0   | 0   | 0   | 1       | 1       | 1      | 1      | 1      |
| M24 | 2.94     | 1    | 1    | 1   | 1   | 1   | 1       | 1       | 1      | 1      | 1      |
| M25 | 3.33     | 1    | 1    | 1   | 1   | 1   | 1       | 1       | 0      | 0      | 0      |
| M26 | 3.86     | 0    | 0    | 0   | 0   | 0   | 1       | 1       | 1      | 1      | 1      |
| M27 | 4        | 1    | 1    | 1   | 1   | 1   | 1       | 1       | 1      | 1      | 1      |
| M28 | 4.25     | 0    | 0    | 0   | 0   | 0   | 1       | 1       | 1      | 1      | 1      |
| M29 | 4.58     | 1    | 1    | 1   | 1   | 1   | 1       | 1       | 1      | 1      | 1      |
| M30 | 4.83     | 0    | 0    | 0   | 0   | 0   | 0       | 0       | 0      | 0      | 1      |
| M31 | 5.34     | 0    | 0    | 0   | 0   | 0   | 1       | 1       | 1      | 1      | 1      |
| M32 | 5.7      | 1    | 1    | 1   | 1   | 1   | 1       | 1       | 1      | 1      | 1      |
| M33 | 5.75     | 1    | 1    | 1   | 1   | 1   | 1       | 1       | 1      | 1      | 1      |
| M34 | 5.79     | 0    | 0    | 0   | 0   | 0   | 0       | 0       | 0      | 1      | 1      |
| M35 | 5.93     | 0    | 0    | 0   | 0   | 0   | 0       | 0       | 1      | 1      | 1      |
| M36 | 7.01     | 1    | 1    | 1   | 1   | 1   | 1       | 1       | 1      | 1      | 1      |
| M37 | 7.06     | 0    | 0    | 0   | 0   | 0   | 1       | 1       | 1      | 1      | 1      |

|     |       |   |   |   |   |   |   |   |   |   |   |
|-----|-------|---|---|---|---|---|---|---|---|---|---|
| M38 | 7.57  | 1 | 1 | 1 | 1 | 1 | 1 | 1 | 1 | 1 | 1 |
| M39 | 7.59  | 0 | 0 | 0 | 0 | 0 | 0 | 0 | 0 | 0 | 1 |
| M40 | 7.62  | 1 | 1 | 1 | 1 | 1 | 1 | 1 | 1 | 1 | 1 |
| M41 | 7.67  | 1 | 1 | 1 | 1 | 1 | 1 | 1 | 1 | 1 | 1 |
| M42 | 7.68  | 0 | 0 | 0 | 0 | 0 | 0 | 0 | 0 | 0 | 0 |
| M43 | 7.93  | 0 | 0 | 0 | 0 | 0 | 1 | 1 | 1 | 1 | 1 |
| M44 | 8.53  | 1 | 1 | 1 | 1 | 1 | 1 | 1 | 1 | 1 | 1 |
| M45 | 9.55  | 1 | 1 | 1 | 1 | 1 | 1 | 1 | 1 | 1 | 1 |
| M46 | 10.36 | 1 | 1 | 1 | 1 | 1 | 1 | 1 | 1 | 1 | 1 |
| M47 | 11.38 | 0 | 0 | 0 | 0 | 0 | 1 | 1 | 1 | 1 | 1 |
| M48 | 12.86 | 1 | 1 | 1 | 1 | 1 | 1 | 1 | 1 | 1 | 1 |
| M49 | 14.23 | 0 | 0 | 0 | 0 | 0 | 1 | 1 | 1 | 1 | 1 |
| M50 | 14.43 | 1 | 1 | 1 | 1 | 1 | 1 | 1 | 1 | 1 | 1 |
| M51 | 17.36 | 1 | 1 | 1 | 1 | 1 | 1 | 1 | 1 | 1 | 1 |
| M52 | 18.34 | 1 | 1 | 1 | 1 | 1 | 1 | 1 | 1 | 1 | 1 |

Table S21: Summary of the annotation of the standards mixture using XCMS-CliqueMS with various signal-to-noise thresholds (sn1-sn24), and prefilters either enabled and set to their default values or entirely disabled (nf).

Correctly annotated analytes are represented by a (1), while (0) signifies that the compound was either not detected, not annotated or incorrectly annotated.

| ID  | RT (min) | SN24 | SN12 | SN6 | SN3 | SN1 | SN24-NF | SN12-NF | SN6-NF | SN3-NF | SN1-NF |
|-----|----------|------|------|-----|-----|-----|---------|---------|--------|--------|--------|
| M1  | 1.12     | 0    | 0    | 0   | 0   | 0   | 1       | 1       | 1      | 0      | 0      |
| M2  | 1.15     | 0    | 0    | 0   | 0   | 0   | 1       | 1       | 1      | 1      | 1      |
| M3  | 1.16     | 0    | 0    | 0   | 0   | 0   | 1       | 1       | 1      | 1      | 0      |
| M4  | 1.17     | 0    | 0    | 0   | 0   | 0   | 1       | 1       | 0      | 1      | 1      |
| M5  | 1.2      | 0    | 0    | 0   | 0   | 0   | 0       | 0       | 0      | 1      | 1      |
| M6  | 1.2      | 1    | 1    | 1   | 1   | 1   | 1       | 1       | 1      | 1      | 1      |
| M7  | 1.21     | 1    | 1    | 1   | 1   | 1   | 1       | 1       | 1      | 1      | 1      |
| M8  | 1.22     | 0    | 0    | 0   | 0   | 0   | 1       | 1       | 1      | 1      | 1      |
| M9  | 1.25     | 1    | 1    | 1   | 1   | 1   | 1       | 1       | 1      | 1      | 1      |
| M10 | 1.26     | 0    | 0    | 0   | 0   | 0   | 0       | 0       | 0      | 0      | 0      |
| M11 | 1.27     | 0    | 0    | 0   | 0   | 0   | 0       | 1       | 1      | 1      | 1      |
| M12 | 1.27     | 1    | 1    | 1   | 1   | 1   | 1       | 1       | 1      | 1      | 1      |
| M13 | 1.3      | 0    | 0    | 0   | 0   | 0   | 1       | 1       | 1      | 1      | 1      |
| M14 | 1.31     | 1    | 1    | 1   | 1   | 1   | 1       | 1       | 1      | 1      | 1      |
| M15 | 1.34     | 0    | 0    | 0   | 0   | 0   | 1       | 1       | 1      | 1      | 1      |
| M16 | 1.35     | 0    | 0    | 0   | 0   | 0   | 1       | 1       | 1      | 1      | 1      |
| M17 | 1.38     | 1    | 1    | 1   | 1   | 1   | 1       | 1       | 1      | 1      | 1      |
| M18 | 1.56     | 0    | 0    | 1   | 1   | 1   | 0       | 1       | 1      | 1      | 1      |
| M19 | 1.82     | 0    | 0    | 0   | 0   | 0   | 1       | 1       | 1      | 1      | 1      |
| M20 | 1.88     | 0    | 0    | 0   | 0   | 0   | 1       | 1       | 1      | 1      | 1      |
| M21 | 1.98     | 0    | 0    | 0   | 0   | 0   | 0       | 0       | 0      | 1      | 1      |
| M22 | 2.08     | 0    | 0    | 0   | 0   | 0   | 0       | 1       | 1      | 1      | 1      |
| M23 | 2.37     | 0    | 0    | 0   | 0   | 0   | 1       | 1       | 1      | 1      | 1      |
| M24 | 2.94     | 1    | 1    | 1   | 1   | 1   | 1       | 1       | 1      | 1      | 1      |
| M25 | 3.33     | 1    | 1    | 1   | 1   | 1   | 1       | 1       | 1      | 1      | 1      |
| M26 | 3.86     | 0    | 0    | 0   | 0   | 0   | 1       | 1       | 1      | 1      | 1      |
| M27 | 4        | 1    | 1    | 1   | 1   | 1   | 1       | 1       | 1      | 1      | 1      |
| M28 | 4.25     | 0    | 0    | 0   | 0   | 0   | 1       | 1       | 1      | 1      | 1      |
| M29 | 4.58     | 1    | 1    | 1   | 1   | 1   | 1       | 1       | 1      | 1      | 1      |
| M30 | 4.83     | 0    | 0    | 0   | 0   | 0   | 0       | 0       | 0      | 0      | 1      |
| M31 | 5.34     | 0    | 0    | 0   | 0   | 0   | 1       | 1       | 1      | 1      | 1      |
| M32 | 5.7      | 1    | 1    | 1   | 1   | 1   | 1       | 1       | 1      | 1      | 1      |
| M33 | 5.75     | 1    | 1    | 1   | 1   | 1   | 1       | 1       | 1      | 1      | 1      |
| M34 | 5.79     | 0    | 0    | 0   | 0   | 0   | 0       | 0       | 0      | 1      | 0      |
| M35 | 5.93     | 0    | 0    | 0   | 0   | 0   | 0       | 0       | 1      | 1      | 1      |
| M36 | 7.01     | 1    | 1    | 1   | 1   | 1   | 1       | 1       | 1      | 1      | 1      |
| M37 | 7.06     | 0    | 0    | 0   | 0   | 0   | 1       | 1       | 1      | 1      | 1      |

|     |       |   |   |   |   |   |   |   |   |   |   |
|-----|-------|---|---|---|---|---|---|---|---|---|---|
| M38 | 7.57  | 1 | 1 | 1 | 1 | 1 | 1 | 1 | 1 | 1 | 1 |
| M39 | 7.59  | 0 | 0 | 0 | 0 | 0 | 0 | 0 | 0 | 0 | 1 |
| M40 | 7.62  | 1 | 1 | 1 | 1 | 1 | 1 | 1 | 1 | 1 | 1 |
| M41 | 7.67  | 1 | 1 | 1 | 1 | 1 | 1 | 1 | 1 | 1 | 1 |
| M42 | 7.68  | 0 | 0 | 0 | 0 | 0 | 0 | 0 | 0 | 0 | 0 |
| M43 | 7.93  | 0 | 0 | 0 | 0 | 0 | 1 | 1 | 1 | 1 | 1 |
| M44 | 8.53  | 1 | 1 | 1 | 1 | 1 | 1 | 1 | 1 | 1 | 1 |
| M45 | 9.55  | 1 | 1 | 1 | 1 | 1 | 1 | 1 | 1 | 1 | 1 |
| M46 | 10.36 | 1 | 1 | 1 | 1 | 1 | 1 | 1 | 1 | 1 | 1 |
| M47 | 11.38 | 0 | 0 | 0 | 0 | 0 | 1 | 1 | 1 | 1 | 1 |
| M48 | 12.86 | 1 | 1 | 1 | 1 | 1 | 1 | 1 | 1 | 1 | 1 |
| M49 | 14.23 | 0 | 0 | 0 | 0 | 0 | 1 | 1 | 1 | 1 | 1 |
| M50 | 14.43 | 1 | 1 | 1 | 1 | 1 | 1 | 1 | 1 | 1 | 1 |
| M51 | 17.36 | 1 | 1 | 1 | 1 | 1 | 1 | 1 | 1 | 1 | 1 |
| M52 | 18.34 | 1 | 1 | 1 | 1 | 1 | 1 | 1 | 1 | 1 | 1 |

Table S22: Summary of the annotation of the standards mixture using XCMS-FindMain with various signal-to-noise thresholds (sn1-sn24), and prefilters either enabled and set to their default values or entirely disabled (nf).

Correctly annotated analytes are represented by a (1), while (0) signifies that the compound was either not detected, not annotated or incorrectly annotated.

| ID  | RT (min) | SN24 | SN12 | SN6 | SN3 | SN1 | SN24-NF | SN12-NF | SN6-NF | SN3-NF | SN1-NF |
|-----|----------|------|------|-----|-----|-----|---------|---------|--------|--------|--------|
| M1  | 1.12     | 0    | 0    | 0   | 0   | 0   | 1       | 1       | 1      | 0      | 0      |
| M2  | 1.15     | 0    | 0    | 0   | 0   | 0   | 1       | 1       | 1      | 1      | 1      |
| M3  | 1.16     | 0    | 0    | 0   | 0   | 0   | 1       | 1       | 1      | 1      | 0      |
| M4  | 1.17     | 0    | 0    | 0   | 0   | 0   | 1       | 1       | 0      | 1      | 1      |
| M5  | 1.2      | 0    | 0    | 0   | 0   | 0   | 0       | 0       | 0      | 1      | 1      |
| M6  | 1.2      | 1    | 1    | 1   | 1   | 1   | 1       | 1       | 1      | 1      | 1      |
| M7  | 1.21     | 1    | 1    | 1   | 1   | 1   | 1       | 1       | 1      | 1      | 1      |
| M8  | 1.22     | 0    | 0    | 0   | 0   | 0   | 1       | 1       | 1      | 1      | 1      |
| M9  | 1.25     | 1    | 1    | 1   | 1   | 1   | 1       | 1       | 1      | 1      | 1      |
| M10 | 1.26     | 0    | 0    | 0   | 0   | 0   | 0       | 0       | 0      | 0      | 0      |
| M11 | 1.27     | 0    | 0    | 0   | 0   | 0   | 0       | 1       | 1      | 1      | 1      |
| M12 | 1.27     | 1    | 1    | 1   | 1   | 1   | 1       | 1       | 1      | 1      | 1      |
| M13 | 1.3      | 0    | 0    | 0   | 0   | 0   | 1       | 1       | 1      | 1      | 1      |
| M14 | 1.31     | 1    | 1    | 1   | 1   | 1   | 1       | 1       | 1      | 1      | 1      |
| M15 | 1.34     | 0    | 0    | 0   | 0   | 0   | 1       | 1       | 1      | 1      | 1      |
| M16 | 1.35     | 0    | 0    | 0   | 0   | 0   | 1       | 1       | 1      | 1      | 1      |
| M17 | 1.38     | 1    | 1    | 1   | 1   | 1   | 1       | 1       | 1      | 1      | 1      |
| M18 | 1.56     | 0    | 0    | 1   | 1   | 1   | 0       | 1       | 1      | 1      | 1      |
| M19 | 1.82     | 0    | 0    | 0   | 0   | 0   | 1       | 1       | 1      | 1      | 1      |
| M20 | 1.88     | 0    | 0    | 0   | 0   | 0   | 1       | 1       | 1      | 1      | 1      |
| M21 | 1.98     | 0    | 0    | 0   | 0   | 0   | 0       | 0       | 0      | 1      | 1      |
| M22 | 2.08     | 0    | 0    | 0   | 0   | 0   | 0       | 1       | 1      | 1      | 1      |
| M23 | 2.37     | 0    | 0    | 0   | 0   | 0   | 1       | 1       | 1      | 1      | 1      |
| M24 | 2.94     | 1    | 1    | 1   | 1   | 1   | 1       | 1       | 1      | 1      | 1      |
| M25 | 3.33     | 1    | 1    | 1   | 1   | 1   | 1       | 1       | 1      | 1      | 1      |
| M26 | 3.86     | 0    | 0    | 0   | 0   | 0   | 1       | 1       | 1      | 1      | 1      |
| M27 | 4        | 1    | 1    | 1   | 1   | 1   | 1       | 1       | 1      | 1      | 1      |
| M28 | 4.25     | 0    | 0    | 0   | 0   | 0   | 1       | 1       | 1      | 1      | 1      |
| M29 | 4.58     | 1    | 1    | 1   | 1   | 1   | 1       | 1       | 1      | 1      | 1      |
| M30 | 4.83     | 0    | 0    | 0   | 0   | 0   | 0       | 0       | 0      | 0      | 1      |
| M31 | 5.34     | 0    | 0    | 0   | 0   | 0   | 1       | 1       | 1      | 1      | 1      |
| M32 | 5.7      | 1    | 1    | 1   | 1   | 1   | 1       | 1       | 1      | 1      | 1      |
| M33 | 5.75     | 1    | 1    | 1   | 1   | 1   | 1       | 1       | 1      | 1      | 1      |
| M34 | 5.79     | 0    | 0    | 0   | 0   | 0   | 0       | 0       | 0      | 1      | 0      |
| M35 | 5.93     | 0    | 0    | 0   | 0   | 0   | 0       | 0       | 1      | 1      | 1      |
| M36 | 7.01     | 1    | 1    | 1   | 1   | 1   | 1       | 1       | 1      | 1      | 1      |

|     |       |   |   |   |   |   |   |   |   |   |   |
|-----|-------|---|---|---|---|---|---|---|---|---|---|
| M37 | 7.06  | 0 | 0 | 0 | 0 | 0 | 1 | 1 | 1 | 1 | 1 |
| M38 | 7.57  | 1 | 1 | 1 | 1 | 1 | 1 | 1 | 1 | 1 | 1 |
| M39 | 7.59  | 0 | 0 | 0 | 0 | 0 | 0 | 0 | 0 | 0 | 1 |
| M40 | 7.62  | 1 | 1 | 1 | 1 | 1 | 1 | 1 | 1 | 1 | 1 |
| M41 | 7.67  | 1 | 1 | 1 | 1 | 1 | 1 | 1 | 1 | 1 | 1 |
| M42 | 7.68  | 0 | 0 | 0 | 0 | 0 | 0 | 0 | 0 | 0 | 0 |
| M43 | 7.93  | 0 | 0 | 0 | 0 | 0 | 1 | 1 | 1 | 1 | 1 |
| M44 | 8.53  | 1 | 1 | 1 | 1 | 1 | 1 | 1 | 1 | 1 | 1 |
| M45 | 9.55  | 1 | 1 | 1 | 1 | 1 | 1 | 1 | 1 | 1 | 1 |
| M46 | 10.36 | 1 | 1 | 1 | 1 | 1 | 1 | 1 | 1 | 1 | 1 |
| M47 | 11.38 | 0 | 0 | 0 | 0 | 0 | 1 | 1 | 1 | 1 | 1 |
| M48 | 12.86 | 1 | 1 | 1 | 1 | 1 | 1 | 1 | 1 | 1 | 1 |
| M49 | 14.23 | 0 | 0 | 0 | 0 | 0 | 1 | 1 | 1 | 1 | 1 |
| M50 | 14.43 | 1 | 1 | 1 | 1 | 1 | 1 | 1 | 1 | 1 | 1 |
| M51 | 17.36 | 1 | 1 | 1 | 1 | 1 | 1 | 1 | 1 | 1 | 1 |
| M52 | 18.34 | 1 | 1 | 1 | 1 | 1 | 1 | 1 | 1 | 1 | 1 |



Table S23: Summary of the annotation of the standards mixture using XCMS-mzAdan with various signal-to-noise thresholds (sn1-sn24), and prefilters either enabled and set to their default values or entirely disabled (nf).

Correctly annotated analytes are represented by a (1), while (0) signifies that the compound was either not detected, not annotated or incorrectly annotated.

| ID  | RT (min) | SN24 | SN12 | SN6 | SN3 | SN1 | SN24-NF | SN12-NF | SN6-NF | SN3-NF | SN1-NF |
|-----|----------|------|------|-----|-----|-----|---------|---------|--------|--------|--------|
| M1  | 1.12     | 1    | 1    | 1   | 1   | 1   | 1       | 1       | 1      | 1      | 1      |
| M2  | 1.15     | 1    | 1    | 1   | 1   | 1   | 1       | 1       | 1      | 1      | 1      |
| M3  | 1.16     | 1    | 1    | 1   | 1   | 1   | 1       | 1       | 1      | 1      | 1      |
| M4  | 1.17     | 1    | 1    | 1   | 1   | 1   | 1       | 1       | 1      | 1      | 1      |
| M5  | 1.2      | 1    | 1    | 1   | 1   | 1   | 1       | 1       | 1      | 1      | 1      |
| M6  | 1.2      | 1    | 1    | 1   | 1   | 1   | 1       | 1       | 1      | 1      | 1      |
| M7  | 1.21     | 1    | 1    | 1   | 1   | 1   | 1       | 1       | 1      | 1      | 1      |
| M8  | 1.22     | 1    | 1    | 1   | 1   | 1   | 1       | 1       | 1      | 1      | 1      |
| M9  | 1.25     | 1    | 1    | 1   | 1   | 1   | 1       | 1       | 1      | 1      | 1      |
| M10 | 1.26     | 1    | 1    | 1   | 1   | 1   | 1       | 1       | 1      | 1      | 1      |
| M11 | 1.27     | 1    | 1    | 1   | 1   | 1   | 1       | 1       | 1      | 1      | 1      |
| M12 | 1.27     | 1    | 1    | 1   | 1   | 1   | 1       | 1       | 1      | 1      | 1      |
| M13 | 1.3      | 1    | 1    | 1   | 1   | 1   | 1       | 1       | 1      | 1      | 1      |
| M14 | 1.31     | 1    | 1    | 1   | 1   | 1   | 1       | 1       | 1      | 1      | 1      |
| M15 | 1.34     | 1    | 1    | 1   | 1   | 1   | 1       | 1       | 1      | 1      | 1      |
| M16 | 1.35     | 1    | 1    | 1   | 1   | 1   | 1       | 1       | 1      | 1      | 1      |
| M17 | 1.38     | 1    | 1    | 1   | 1   | 1   | 1       | 1       | 1      | 1      | 1      |
| M18 | 1.56     | 1    | 1    | 1   | 1   | 1   | 1       | 1       | 1      | 1      | 1      |
| M19 | 1.82     | 1    | 1    | 1   | 1   | 1   | 1       | 1       | 1      | 1      | 1      |
| M20 | 1.88     | 1    | 1    | 1   | 1   | 1   | 1       | 1       | 1      | 1      | 1      |
| M21 | 1.98     | 1    | 1    | 1   | 1   | 1   | 1       | 1       | 1      | 1      | 1      |
| M22 | 2.08     | 1    | 1    | 1   | 1   | 1   | 1       | 1       | 1      | 1      | 1      |
| M23 | 2.37     | 1    | 1    | 1   | 1   | 1   | 1       | 1       | 1      | 1      | 1      |
| M24 | 2.94     | 1    | 1    | 1   | 1   | 1   | 1       | 1       | 1      | 1      | 1      |
| M25 | 3.33     | 1    | 1    | 1   | 1   | 1   | 1       | 1       | 1      | 1      | 1      |
| M26 | 3.86     | 1    | 1    | 1   | 1   | 1   | 1       | 1       | 1      | 1      | 1      |
| M27 | 4        | 1    | 1    | 1   | 1   | 1   | 1       | 1       | 1      | 1      | 1      |
| M28 | 4.25     | 1    | 1    | 1   | 1   | 1   | 1       | 1       | 1      | 1      | 0      |
| M29 | 4.58     | 1    | 1    | 1   | 1   | 1   | 1       | 1       | 1      | 1      | 1      |
| M30 | 4.83     | 0    | 0    | 0   | 0   | 0   | 1       | 1       | 1      | 1      | 1      |
| M31 | 5.34     | 1    | 1    | 1   | 1   | 1   | 1       | 1       | 1      | 1      | 1      |
| M32 | 5.7      | 1    | 1    | 1   | 1   | 1   | 1       | 1       | 1      | 1      | 1      |
| M33 | 5.75     | 1    | 1    | 1   | 1   | 1   | 1       | 1       | 1      | 1      | 1      |
| M34 | 5.79     | 1    | 1    | 1   | 1   | 1   | 1       | 1       | 1      | 1      | 1      |
| M35 | 5.93     | 1    | 1    | 1   | 1   | 1   | 1       | 1       | 1      | 1      | 1      |
| M36 | 7.01     | 1    | 1    | 1   | 1   | 1   | 1       | 1       | 1      | 1      | 1      |

|     |       |   |   |   |   |   |   |   |   |   |   |
|-----|-------|---|---|---|---|---|---|---|---|---|---|
| M37 | 7.06  | 1 | 1 | 1 | 1 | 1 | 1 | 1 | 1 | 1 | 1 |
| M38 | 7.57  | 1 | 1 | 1 | 1 | 1 | 1 | 1 | 1 | 1 | 1 |
| M39 | 7.59  | 1 | 1 | 1 | 1 | 1 | 1 | 1 | 1 | 1 | 1 |
| M40 | 7.62  | 1 | 1 | 1 | 1 | 1 | 1 | 1 | 1 | 1 | 1 |
| M41 | 7.67  | 1 | 1 | 1 | 1 | 1 | 1 | 1 | 1 | 1 | 1 |
| M42 | 7.68  | 0 | 0 | 0 | 0 | 0 | 1 | 1 | 1 | 1 | 1 |
| M43 | 7.93  | 1 | 1 | 1 | 1 | 1 | 1 | 1 | 1 | 1 | 1 |
| M44 | 8.53  | 1 | 1 | 1 | 1 | 1 | 1 | 1 | 1 | 1 | 1 |
| M45 | 9.55  | 1 | 1 | 1 | 1 | 1 | 1 | 1 | 1 | 1 | 1 |
| M46 | 10.36 | 1 | 1 | 1 | 1 | 1 | 1 | 1 | 1 | 1 | 1 |
| M47 | 11.38 | 1 | 1 | 1 | 1 | 1 | 1 | 1 | 1 | 1 | 1 |
| M48 | 12.86 | 1 | 1 | 1 | 1 | 1 | 1 | 1 | 1 | 1 | 1 |
| M49 | 14.23 | 1 | 1 | 1 | 1 | 1 | 1 | 1 | 1 | 1 | 1 |
| M50 | 14.43 | 1 | 1 | 1 | 1 | 1 | 1 | 1 | 1 | 1 | 1 |
| M51 | 17.36 | 1 | 1 | 1 | 1 | 1 | 1 | 1 | 1 | 1 | 1 |
| M52 | 18.34 | 1 | 1 | 1 | 1 | 1 | 1 | 1 | 1 | 1 | 1 |

Table S24: Summary of the peak picking process of the urine sample using XCMS with various signal-to-noise thresholds (sn1-sn24), and prefilters either enabled and set to their default values or entirely disabled (nf).

Detected analytes are represented by a (1), while (0) signifies that the feature corresponding to the protonated form of the analyte was not found.

| ID  | RT (min) | SN24 | SN12 | SN6 | SN3 | SN1 | SN24-NF | SN12-NF | SN6-NF | SN3-NF | SN1-NF |
|-----|----------|------|------|-----|-----|-----|---------|---------|--------|--------|--------|
| U1  | 1.2      | 1    | 1    | 1   | 1   | 1   | 1       | 1       | 1      | 1      | 1      |
| U2  | 1.21     | 1    | 1    | 1   | 1   | 1   | 1       | 1       | 1      | 1      | 1      |
| U3  | 1.27     | 1    | 1    | 1   | 1   | 1   | 1       | 1       | 1      | 1      | 1      |
| U4  | 1.27     | 0    | 0    | 0   | 0   | 0   | 0       | 0       | 0      | 1      | 1      |
| U5  | 1.28     | 1    | 1    | 1   | 1   | 1   | 1       | 1       | 1      | 1      | 1      |
| U6  | 1.29     | 1    | 1    | 1   | 1   | 1   | 1       | 1       | 1      | 1      | 1      |
| U7  | 1.31     | 1    | 1    | 1   | 1   | 1   | 1       | 1       | 1      | 1      | 1      |
| U8  | 1.35     | 1    | 1    | 1   | 1   | 1   | 1       | 1       | 1      | 1      | 1      |
| U9  | 1.68     | 0    | 0    | 0   | 0   | 0   | 0       | 0       | 1      | 1      | 1      |
| U10 | 1.82     | 1    | 1    | 1   | 1   | 1   | 1       | 1       | 1      | 1      | 1      |
| U11 | 2        | 0    | 1    | 1   | 1   | 1   | 0       | 1       | 1      | 1      | 1      |
| U12 | 2.11     | 1    | 1    | 1   | 1   | 1   | 1       | 1       | 1      | 1      | 1      |
| U13 | 2.2      | 1    | 1    | 1   | 1   | 1   | 1       | 1       | 1      | 1      | 1      |
| U14 | 2.62     | 1    | 1    | 1   | 1   | 1   | 1       | 1       | 1      | 1      | 1      |
| U15 | 2.76     | 1    | 1    | 1   | 1   | 1   | 1       | 1       | 1      | 1      | 1      |
| U16 | 3.13     | 0    | 0    | 0   | 0   | 0   | 0       | 0       | 1      | 1      | 1      |
| U17 | 3.74     | 1    | 1    | 1   | 1   | 1   | 1       | 1       | 1      | 1      | 1      |
| U18 | 3.97     | 1    | 1    | 1   | 1   | 1   | 1       | 1       | 1      | 1      | 1      |
| U19 | 4.09     | 1    | 1    | 1   | 1   | 1   | 1       | 1       | 1      | 1      | 1      |
| U20 | 4.63     | 0    | 0    | 0   | 0   | 0   | 0       | 1       | 1      | 1      | 1      |
| U21 | 4.72     | 1    | 1    | 1   | 1   | 1   | 1       | 1       | 1      | 1      | 1      |
| U22 | 4.83     | 1    | 1    | 1   | 1   | 1   | 1       | 1       | 1      | 1      | 1      |
| U23 | 5.08     | 0    | 0    | 0   | 0   | 0   | 1       | 1       | 1      | 1      | 1      |
| U24 | 5.39     | 1    | 1    | 1   | 1   | 1   | 1       | 1       | 1      | 1      | 1      |
| U25 | 5.42     | 1    | 1    | 1   | 1   | 1   | 1       | 1       | 1      | 1      | 1      |
| U26 | 5.55     | 1    | 1    | 1   | 1   | 1   | 1       | 1       | 1      | 1      | 1      |
| U27 | 6.14     | 1    | 1    | 1   | 1   | 1   | 1       | 1       | 1      | 1      | 1      |
| U28 | 6.78     | 1    | 1    | 1   | 1   | 1   | 1       | 1       | 1      | 1      | 1      |
| U29 | 7.09     | 1    | 1    | 1   | 1   | 1   | 1       | 1       | 1      | 1      | 1      |
| U30 | 7.24     | 0    | 0    | 0   | 0   | 0   | 1       | 1       | 1      | 1      | 1      |
| U31 | 7.25     | 1    | 1    | 1   | 1   | 1   | 1       | 1       | 1      | 1      | 1      |
| U32 | 9.66     | 0    | 0    | 0   | 0   | 0   | 1       | 1       | 1      | 1      | 1      |
| U33 | 10.59    | 1    | 1    | 1   | 1   | 1   | 1       | 1       | 1      | 1      | 1      |
| U34 | 13.24    | 1    | 1    | 1   | 1   | 1   | 1       | 1       | 1      | 1      | 1      |
| U35 | 16.07    | 0    | 0    | 0   | 0   | 0   | 1       | 1       | 1      | 1      | 1      |



Table S25: Summary of the annotation of the urine sample using XCMS-CAMERA with various signal-to-noise thresholds (sn1-sn24), and prefilters either enabled and set to their default values or entirely disabled (nf).

Correctly annotated analytes are represented by a (1), while (0) signifies that the compound was either not detected, not annotated or incorrectly annotated

| ID  | RT (min) | SN24 | SN12 | SN6 | SN3 | SN1 | SN24-NF | SN12-NF | SN6-NF | SN3-NF | SN1-NF |
|-----|----------|------|------|-----|-----|-----|---------|---------|--------|--------|--------|
| U1  | 1.2      | 0    | 0    | 0   | 0   | 0   | 0       | 0       | 0      | 0      | 0      |
| U2  | 1.21     | 0    | 0    | 0   | 0   | 0   | 1       | 1       | 1      | 1      | 1      |
| U3  | 1.27     | 0    | 0    | 0   | 0   | 0   | 0       | 0       | 0      | 0      | 0      |
| U4  | 1.27     | 0    | 0    | 0   | 0   | 0   | 0       | 0       | 0      | 0      | 0      |
| U5  | 1.28     | 0    | 0    | 0   | 0   | 0   | 0       | 0       | 0      | 0      | 0      |
| U6  | 1.29     | 0    | 0    | 0   | 0   | 0   | 0       | 0       | 0      | 0      | 0      |
| U7  | 1.31     | 0    | 0    | 0   | 0   | 0   | 0       | 1       | 1      | 1      | 1      |
| U8  | 1.35     | 1    | 1    | 1   | 1   | 1   | 1       | 1       | 1      | 1      | 1      |
| U9  | 1.68     | 0    | 0    | 0   | 0   | 0   | 0       | 0       | 0      | 0      | 0      |
| U10 | 1.82     | 0    | 0    | 0   | 0   | 0   | 0       | 0       | 0      | 0      | 0      |
| U11 | 2        | 0    | 0    | 0   | 0   | 0   | 0       | 0       | 0      | 0      | 0      |
| U12 | 2.11     | 0    | 0    | 0   | 0   | 0   | 0       | 0       | 0      | 0      | 0      |
| U13 | 2.2      | 0    | 0    | 0   | 0   | 0   | 0       | 0       | 0      | 0      | 0      |
| U14 | 2.62     | 1    | 1    | 1   | 1   | 1   | 1       | 1       | 1      | 1      | 1      |
| U15 | 2.76     | 0    | 0    | 0   | 0   | 0   | 1       | 1       | 1      | 1      | 1      |
| U16 | 3.13     | 0    | 0    | 0   | 0   | 0   | 0       | 0       | 0      | 0      | 0      |
| U17 | 3.74     | 0    | 0    | 0   | 0   | 0   | 0       | 0       | 0      | 0      | 0      |
| U18 | 3.97     | 0    | 0    | 0   | 0   | 0   | 0       | 0       | 1      | 1      | 1      |
| U19 | 4.09     | 0    | 0    | 0   | 0   | 0   | 0       | 0       | 0      | 0      | 0      |
| U20 | 4.63     | 0    | 0    | 0   | 0   | 0   | 0       | 0       | 0      | 0      | 0      |
| U21 | 4.72     | 0    | 0    | 0   | 0   | 0   | 0       | 1       | 1      | 1      | 1      |
| U22 | 4.83     | 1    | 1    | 1   | 1   | 1   | 1       | 1       | 1      | 1      | 1      |
| U23 | 5.08     | 0    | 0    | 0   | 0   | 0   | 0       | 0       | 0      | 0      | 0      |
| U24 | 5.39     | 1    | 1    | 1   | 1   | 1   | 1       | 1       | 1      | 1      | 1      |
| U25 | 5.42     | 0    | 0    | 0   | 0   | 0   | 0       | 0       | 0      | 1      | 0      |
| U26 | 5.55     | 0    | 0    | 0   | 0   | 0   | 0       | 1       | 1      | 1      | 1      |
| U27 | 6.14     | 1    | 1    | 1   | 1   | 1   | 1       | 1       | 1      | 1      | 1      |
| U28 | 6.78     | 0    | 0    | 0   | 0   | 0   | 0       | 0       | 1      | 1      | 1      |
| U29 | 7.09     | 0    | 0    | 0   | 0   | 0   | 0       | 0       | 0      | 0      | 0      |
| U30 | 7.24     | 0    | 0    | 0   | 0   | 0   | 0       | 0       | 0      | 0      | 0      |
| U31 | 7.25     | 1    | 1    | 1   | 1   | 1   | 1       | 1       | 1      | 1      | 1      |
| U32 | 9.66     | 0    | 0    | 0   | 0   | 0   | 0       | 0       | 0      | 1      | 1      |
| U33 | 10.59    | 0    | 0    | 0   | 0   | 0   | 0       | 1       | 1      | 1      | 1      |
| U34 | 13.24    | 0    | 0    | 0   | 0   | 0   | 1       | 1       | 1      | 1      | 1      |
| U35 | 16.07    | 0    | 0    | 0   | 0   | 0   | 1       | 1       | 1      | 1      | 1      |



Table S26: Summary of the annotation of the urine sample using XCMS-CliqueMS with various signal-to-noise thresholds (sn1-sn24), and prefilters either enabled and set to their default values or entirely disabled (nf).

Correctly annotated analytes are represented by a (1), while (0) signifies that the compound was either not detected, not annotated or incorrectly annotated.

| ID  | RT (min) | SN24 | SN12 | SN6 | SN3 | SN1 | SN24-NF | SN12-NF | SN6-NF | SN3-NF | SN1-NF |
|-----|----------|------|------|-----|-----|-----|---------|---------|--------|--------|--------|
| U1  | 1.2      | 0    | 0    | 0   | 0   | 0   | 1       | 1       | 1      | 1      | 1      |
| U2  | 1.21     | 0    | 0    | 0   | 0   | 0   | 1       | 0       | 1      | 1      | 1      |
| U3  | 1.27     | 0    | 0    | 0   | 0   | 0   | 0       | 0       | 1      | 1      | 1      |
| U4  | 1.27     | 0    | 0    | 0   | 0   | 0   | 0       | 0       | 0      | 0      | 0      |
| U5  | 1.28     | 0    | 0    | 0   | 0   | 0   | 0       | 0       | 0      | 0      | 0      |
| U6  | 1.29     | 0    | 0    | 0   | 0   | 0   | 0       | 0       | 0      | 0      | 0      |
| U7  | 1.31     | 0    | 0    | 0   | 0   | 0   | 0       | 1       | 1      | 0      | 1      |
| U8  | 1.35     | 1    | 1    | 1   | 1   | 1   | 1       | 1       | 1      | 1      | 0      |
| U9  | 1.68     | 0    | 0    | 0   | 0   | 0   | 0       | 0       | 0      | 0      | 0      |
| U10 | 1.82     | 0    | 0    | 0   | 0   | 0   | 1       | 1       | 1      | 1      | 1      |
| U11 | 2        | 0    | 0    | 0   | 0   | 0   | 0       | 0       | 0      | 0      | 0      |
| U12 | 2.11     | 0    | 0    | 0   | 0   | 0   | 0       | 0       | 0      | 0      | 0      |
| U13 | 2.2      | 0    | 0    | 0   | 0   | 0   | 0       | 0       | 0      | 0      | 0      |
| U14 | 2.62     | 1    | 1    | 1   | 1   | 1   | 1       | 1       | 1      | 1      | 1      |
| U15 | 2.76     | 0    | 0    | 0   | 0   | 0   | 1       | 1       | 1      | 1      | 1      |
| U16 | 3.13     | 0    | 0    | 0   | 0   | 0   | 0       | 0       | 0      | 1      | 1      |
| U17 | 3.74     | 0    | 0    | 0   | 0   | 0   | 0       | 0       | 0      | 0      | 0      |
| U18 | 3.97     | 0    | 0    | 0   | 0   | 0   | 0       | 0       | 1      | 1      | 1      |
| U19 | 4.09     | 0    | 0    | 0   | 0   | 0   | 0       | 0       | 0      | 1      | 1      |
| U20 | 4.63     | 0    | 0    | 0   | 0   | 0   | 0       | 0       | 0      | 0      | 0      |
| U21 | 4.72     | 0    | 0    | 0   | 0   | 0   | 0       | 1       | 1      | 1      | 1      |
| U22 | 4.83     | 1    | 1    | 1   | 1   | 1   | 1       | 1       | 1      | 1      | 1      |
| U23 | 5.08     | 0    | 0    | 0   | 0   | 0   | 0       | 0       | 0      | 0      | 0      |
| U24 | 5.39     | 1    | 1    | 1   | 1   | 1   | 1       | 1       | 1      | 1      | 1      |
| U25 | 5.42     | 0    | 0    | 0   | 0   | 0   | 0       | 0       | 0      | 0      | 0      |
| U26 | 5.55     | 0    | 0    | 0   | 0   | 0   | 0       | 1       | 1      | 1      | 1      |
| U27 | 6.14     | 1    | 1    | 1   | 1   | 1   | 1       | 1       | 1      | 1      | 1      |
| U28 | 6.78     | 0    | 0    | 0   | 0   | 0   | 0       | 0       | 1      | 1      | 1      |
| U29 | 7.09     | 0    | 0    | 0   | 0   | 0   | 0       | 0       | 0      | 0      | 0      |
| U30 | 7.24     | 0    | 0    | 0   | 0   | 0   | 0       | 0       | 0      | 0      | 0      |
| U31 | 7.25     | 1    | 1    | 1   | 1   | 1   | 1       | 1       | 1      | 1      | 1      |
| U32 | 9.66     | 0    | 0    | 0   | 0   | 0   | 0       | 0       | 1      | 1      | 1      |
| U33 | 10.59    | 0    | 0    | 0   | 0   | 0   | 0       | 1       | 1      | 1      | 1      |
| U34 | 13.24    | 0    | 0    | 0   | 0   | 0   | 0       | 1       | 1      | 1      | 1      |
| U35 | 16.07    | 0    | 0    | 0   | 0   | 0   | 1       | 1       | 1      | 1      | 1      |

Table S27: Summary of the annotation of the urine sample using XCMS-FindMain with various signal-to-noise thresholds (sn1-sn24), and prefilters either enabled and set to their default values or entirely disabled (nf).

Correctly annotated analytes are represented by a (1), while (0) signifies that the compound was either not detected, not annotated or incorrectly annotated.

| ID  | RT (min) | SN24 | SN12 | SN6 | SN3 | SN1 | SN24-NF | SN12-NF | SN6-NF | SN3-NF | SN1-NF |
|-----|----------|------|------|-----|-----|-----|---------|---------|--------|--------|--------|
| U1  | 1.2      | 1    | 1    | 1   | 1   | 1   | 0       | 0       | 0      | 0      | 0      |
| U2  | 1.21     | 1    | 1    | 1   | 1   | 1   | 1       | 1       | 1      | 1      | 1      |
| U3  | 1.27     | 1    | 1    | 1   | 1   | 1   | 1       | 1       | 0      | 1      | 1      |
| U4  | 1.27     | 0    | 0    | 0   | 0   | 0   | 0       | 0       | 0      | 0      | 0      |
| U5  | 1.28     | 1    | 1    | 1   | 1   | 1   | 0       | 0       | 0      | 0      | 0      |
| U6  | 1.29     | 1    | 1    | 1   | 1   | 1   | 1       | 1       | 0      | 0      | 0      |
| U7  | 1.31     | 1    | 1    | 1   | 1   | 1   | 1       | 1       | 1      | 1      | 1      |
| U8  | 1.35     | 1    | 1    | 1   | 1   | 1   | 1       | 1       | 1      | 1      | 1      |
| U9  | 1.68     | 0    | 0    | 0   | 0   | 0   | 0       | 0       | 0      | 0      | 0      |
| U10 | 1.82     | 1    | 1    | 1   | 1   | 1   | 1       | 1       | 1      | 1      | 1      |
| U11 | 2        | 0    | 1    | 1   | 1   | 1   | 0       | 0       | 0      | 0      | 0      |
| U12 | 2.11     | 1    | 1    | 1   | 1   | 1   | 1       | 1       | 1      | 1      | 1      |
| U13 | 2.2      | 1    | 1    | 1   | 1   | 1   | 1       | 1       | 1      | 1      | 1      |
| U14 | 2.62     | 1    | 1    | 1   | 1   | 1   | 1       | 1       | 1      | 1      | 1      |
| U15 | 2.76     | 1    | 1    | 1   | 1   | 1   | 1       | 1       | 1      | 1      | 1      |
| U16 | 3.13     | 0    | 0    | 0   | 0   | 0   | 0       | 0       | 0      | 1      | 1      |
| U17 | 3.74     | 1    | 1    | 1   | 1   | 1   | 1       | 1       | 1      | 1      | 1      |
| U18 | 3.97     | 1    | 1    | 1   | 1   | 1   | 1       | 0       | 1      | 1      | 1      |
| U19 | 4.09     | 1    | 1    | 1   | 1   | 1   | 1       | 1       | 1      | 1      | 1      |
| U20 | 4.63     | 0    | 0    | 0   | 0   | 0   | 0       | 0       | 0      | 0      | 0      |
| U21 | 4.72     | 1    | 1    | 1   | 1   | 1   | 1       | 1       | 1      | 1      | 1      |
| U22 | 4.83     | 1    | 1    | 1   | 1   | 1   | 1       | 1       | 1      | 1      | 1      |
| U23 | 5.08     | 0    | 0    | 0   | 0   | 0   | 1       | 1       | 0      | 0      | 0      |
| U24 | 5.39     | 1    | 1    | 1   | 1   | 1   | 1       | 1       | 1      | 1      | 1      |
| U25 | 5.42     | 1    | 1    | 1   | 1   | 1   | 1       | 1       | 1      | 1      | 1      |
| U26 | 5.55     | 1    | 1    | 1   | 1   | 1   | 1       | 1       | 1      | 1      | 1      |
| U27 | 6.14     | 1    | 1    | 1   | 1   | 1   | 1       | 1       | 1      | 1      | 1      |
| U28 | 6.78     | 1    | 1    | 1   | 1   | 1   | 1       | 1       | 1      | 1      | 1      |
| U29 | 7.09     | 1    | 1    | 1   | 1   | 1   | 1       | 1       | 1      | 1      | 1      |
| U30 | 7.24     | 0    | 0    | 0   | 0   | 0   | 0       | 0       | 0      | 0      | 0      |
| U31 | 7.25     | 1    | 1    | 1   | 1   | 1   | 1       | 1       | 1      | 1      | 1      |
| U32 | 9.66     | 0    | 0    | 0   | 0   | 0   | 1       | 1       | 1      | 1      | 1      |
| U33 | 10.59    | 1    | 1    | 1   | 1   | 1   | 1       | 1       | 1      | 1      | 1      |
| U34 | 13.24    | 1    | 1    | 1   | 1   | 1   | 1       | 1       | 1      | 1      | 1      |
| U35 | 16.07    | 0    | 0    | 0   | 0   | 0   | 0       | 0       | 0      | 0      | 0      |



Table S28: Summary of the annotation of the urine sample using XCMS-mzAdan with various signal-to-noise thresholds (sn1-sn24), and prefilters either enabled and set to their default values or entirely disabled (nf).

Correctly annotated analytes are represented by a (1), while (0) signifies that the compound was either not detected, not annotated or incorrectly annotated.

| ID  | RT (min) | SN24 | SN12 | SN6 | SN3 | SN1 | SN24-NF | SN12-NF | SN6-NF | SN3-NF | SN1-NF |
|-----|----------|------|------|-----|-----|-----|---------|---------|--------|--------|--------|
| U1  | 1.2      | 1    | 1    | 1   | 1   | 1   | 1       | 1       | 1      | 1      | 1      |
| U2  | 1.21     | 1    | 1    | 1   | 1   | 1   | 1       | 1       | 1      | 1      | 1      |
| U3  | 1.27     | 1    | 1    | 1   | 1   | 1   | 1       | 1       | 1      | 1      | 1      |
| U4  | 1.27     | 0    | 0    | 0   | 0   | 0   | 0       | 0       | 0      | 1      | 1      |
| U5  | 1.28     | 1    | 1    | 1   | 1   | 1   | 1       | 1       | 1      | 1      | 1      |
| U6  | 1.29     | 1    | 1    | 1   | 1   | 1   | 1       | 1       | 1      | 1      | 1      |
| U7  | 1.31     | 1    | 1    | 1   | 1   | 1   | 1       | 1       | 1      | 1      | 1      |
| U8  | 1.35     | 1    | 1    | 1   | 1   | 1   | 0       | 0       | 0      | 0      | 0      |
| U9  | 1.68     | 0    | 0    | 0   | 0   | 0   | 0       | 0       | 1      | 1      | 1      |
| U10 | 1.82     | 1    | 1    | 1   | 1   | 1   | 1       | 1       | 1      | 1      | 1      |
| U11 | 2        | 0    | 1    | 1   | 1   | 1   | 0       | 1       | 1      | 1      | 1      |
| U12 | 2.11     | 1    | 1    | 1   | 1   | 1   | 1       | 1       | 1      | 1      | 1      |
| U13 | 2.2      | 1    | 1    | 1   | 1   | 1   | 1       | 1       | 1      | 1      | 1      |
| U14 | 2.62     | 1    | 1    | 1   | 1   | 1   | 1       | 1       | 1      | 1      | 1      |
| U15 | 2.76     | 1    | 1    | 1   | 1   | 1   | 1       | 1       | 1      | 1      | 1      |
| U16 | 3.13     | 0    | 0    | 0   | 0   | 0   | 0       | 0       | 1      | 1      | 1      |
| U17 | 3.74     | 1    | 1    | 1   | 1   | 1   | 1       | 1       | 1      | 1      | 1      |
| U18 | 3.97     | 1    | 1    | 1   | 1   | 1   | 1       | 1       | 1      | 1      | 1      |
| U19 | 4.09     | 1    | 1    | 1   | 1   | 1   | 1       | 1       | 1      | 1      | 1      |
| U20 | 4.63     | 1    | 0    | 0   | 0   | 0   | 0       | 1       | 1      | 1      | 1      |
| U21 | 4.72     | 1    | 1    | 1   | 1   | 1   | 1       | 1       | 1      | 1      | 1      |
| U22 | 4.83     | 1    | 1    | 1   | 1   | 1   | 1       | 1       | 1      | 1      | 1      |
| U23 | 5.08     | 0    | 0    | 0   | 0   | 0   | 1       | 1       | 1      | 1      | 1      |
| U24 | 5.39     | 1    | 1    | 1   | 1   | 1   | 1       | 1       | 1      | 1      | 1      |
| U25 | 5.42     | 1    | 1    | 1   | 1   | 1   | 1       | 1       | 1      | 1      | 1      |
| U26 | 5.55     | 1    | 1    | 1   | 1   | 1   | 1       | 1       | 1      | 1      | 1      |
| U27 | 6.14     | 1    | 1    | 1   | 1   | 1   | 1       | 1       | 1      | 0      | 0      |
| U28 | 6.78     | 1    | 1    | 1   | 1   | 1   | 1       | 1       | 1      | 1      | 1      |
| U29 | 7.09     | 1    | 1    | 1   | 1   | 1   | 1       | 1       | 1      | 1      | 1      |
| U30 | 7.24     | 0    | 0    | 0   | 0   | 0   | 1       | 1       | 1      | 1      | 1      |
| U31 | 7.25     | 1    | 1    | 1   | 1   | 1   | 1       | 1       | 1      | 1      | 1      |
| U32 | 9.66     | 0    | 0    | 0   | 0   | 0   | 1       | 1       | 1      | 1      | 1      |
| U33 | 10.59    | 1    | 1    | 1   | 1   | 1   | 1       | 1       | 1      | 1      | 1      |
| U34 | 13.24    | 1    | 1    | 1   | 1   | 1   | 1       | 1       | 1      | 1      | 1      |
| U35 | 16.07    | 0    | 0    | 0   | 0   | 0   | 1       | 1       | 1      | 1      | 1      |
